# Supplementary material for: Characteristics and process controls of statistical floodmoments in Europe – a data based analysis
Source: Copernicus journal article supplement (doi:10.5194/hess-2020-600), 2020-12-10
Supplement: Supplementary file [file hess-2020-600-AC2-supplement.pdf]

Response to the interactive comments to the manuscript [hess-2020-600](#)

## “Characteristics and process controls of statistical flood moments in Europe – a data based”

by D. Lun, A. Viglione, M. Bertola, J. Komma, J. Parajka, P. Valent and G. Blöschl

Here we reproduce all comments of the Referee in *italic characters*, followed by our answers

### Anonymous Referee #2

*This manuscript has the potential to serve as a strong reference for characterizing the spatial variability of annual peak-flow moments at sites without strong anthropogenic modifications, such as reservoirs, throughout Europe. The leave-one-out cross-validation of a multiple regression model predicting flood moments (mean,  $C_v$ ,  $C_s$ ) suggests that, with follow-up efforts, this work could be used to estimate flood moments at ungauged locations with reasonable accuracy in many locations. This work also documents large-scale spatial patterns in controls on flood moments throughout the continent, although the process controls revealed are not especially surprising to people with knowledge of European hydrology. However, numerous technical and presentation improvements detailed below are needed to make this manuscript publishable in HESS. In addition, a more compelling case for how this research could benefit both stationary and nonstationary flood-frequency analysis would be helpful. I have also attached a Tracked Changes Word document with more specific writing and presentation suggestions and some more minor technical inquiries.*

We thank the anonymous referee for the time he or she spent on our manuscript and his or her detailed and constructive comments that will help improve the quality of the manuscript. We are especially thankful for the document with specific writing and presentation suggestions. The writing suggestions will almost entirely be included in the revised manuscript, and we reproduce and address the annotated comments from the tracked changes document in this file, after the general review comments. All of the general review comments of the referee are reproduced and addressed in the following paragraphs.

*SOME BASIC CHARACTERISTICS OF THE FLOOD TIME SERIES NEED TO BE CLARIFIED UPFRONT. The authors should state in their abstract whether their set of 2,370 flood series are from stations in anthropogenically impacted basins and whether the “maximum annual flows” they analyze are daily mean flows or instantaneous peak flows. This is important given the small drainage areas of some basins. The authors state that they used the version of the European Flood Database used in Blöschl et al. (2019), which excluded catchments with strong human modifications, such as reservoirs, but did not exclude basins subject to more local anthropogenic perturbations – given their focus on elucidating broad regional patterns. While this dataset contains both [instantaneous?] peak flows and maximum daily mean flows in each year, it seems like the authors might have strictly used peak flows based on descriptions at the beginning of Section 2: “This study uses the data set of European flood discharges of Blöschl, Hall et al. (2019), which . . . consists of 2370 annual maximum peak discharge series from 33 countries”. Also, the authors only used 2,370 stations whereas Blöschl et al. (2019) used 3,783. This discrepancy should be explained briefly. Finally, the authors should clarify*

*earlier in the manuscript whether they used calendar years or a designated water year when identifying annual peaks.*

Thank you for pointing this out. We use the exact same data set as in Figure 1 and Extended Data Figure 2 and 8 in Blöschl, Hall et al. (2019). The data set consists of annual maximum discharges, which were derived from both instantaneous peak flows as well as daily flows (this is explained in the section on datasets in Blöschl, Hall et al., 2019). The year refers to calendar years. We plan to modify the sentence in the abstract about the data in the following way:

“The data consists of annual maximum flood discharge series observed in 2370 catchments in Europe covering the period 1960-2010. Both instantaneous peak flows as well as daily mean flows served as the basis for deriving annual maximum flows for each calendar year, and series with strong human modifications were not included in the analysis.”

We plan to modify a paragraph in the data section in the following way

“This study uses the data set of European flood discharges of Blöschl, Hall et al. (2019), which can be found in their supplementary material. The data is a subset of the data used in Blöschl, Hall et al. (2019), for which stricter selection criteria were used (see their section on datasets for Figure 1 and Extended Data Figures 2 and 8). It consists of 2370 annual maximum discharge series from 33 countries. Catchment areas range from 5 to 100000 km<sup>2</sup>, with a median of 383 km<sup>2</sup>. The observation period is 1960 to 2010, and record lengths range from 30 to 51 years with a median of 51 years. The time series were manually checked for strong human modifications such as reservoirs (Hall et al., 2015 and Blöschl, Hall et al., 2019) and include both rain floods and snowmelt floods (Kemter et al., 2020). Annual maximum discharges were derived from instantaneous peak flows and daily mean flows for each calendar year (Blöschl, Hall et al., 2019). “

*MOMENT ESTIMATION BIASES MUST BE ADDRESSED. The authors need to discuss the bias in their estimates of the  $C_v$  (coefficient of variation) and  $C_s$  (coefficient of skewness).*

*First, with regards to the  $C_v$ , Ye et al. (2020) demonstrated the extent to which common  $C_v$  estimators can be biased when data are skewed or do not adhere to i.i.d. assumptions. While the degree of bias is not as pronounced as it is with daily flow data, quick calculations using the equations described in this paper demonstrate that  $C_v$  of annual peak flows can have a substantial bias.*

*Numerous references have also demonstrated the bias of skewness estimates from small samples, including their dependence on record length (Wallis et al., 1974; Bobee and Robitaille, 1975; Carney, 2016). In their discussion, the authors should also recognize the literature on regional skewness coefficients as well as the weighted skewness approaches combining at-site and regional information that the U.S. Geological Survey employs.*

Thank you for pointing this out. We agree, that the uncertainty and bias of estimators should of course be taken into consideration when interpreting the results of this study.

Unfortunately the bias-corrections for the estimator of the CV discussed in Ye et al. (2020) require assumptions on the distribution of the data, which are not in line with the literature on European floods, where a Generalized Extreme Value distribution is most commonly fitted to annual floods.

We plan to add the following sentence to section 2.3, pointing out, that caution should be used when interpreting spatial patterns of the estimated flood moments, as bias and sampling uncertainty of the respective estimators can be substantial.

“While the estimation uncertainty of the mean is small, the uncertainty and bias of the estimators in equations 3 and 4 can be substantial. Ye et al. (2020) illustrate the uncertainty and bias in the estimation of CV. “

We prefer to use the estimator for CV as given in equation 3 in the manuscript, in order to stay consistent with a large body of hydrological literature and more easily facilitate comparisons in the future.

We agree that statistical estimators of skewness do exhibit substantial bias and are very sensitive with respect to record length. This is among the main reasons why it is so difficult to interpret regional patterns of skewness, as a large portion of these patterns is likely comprised of sampling uncertainty. We plan to modify the text in the manuscript in the following way.

“For a record length of 50 years and a series with the average estimated moments of the entire dataset ( $MAF=0.17 \text{ m}^3 \text{ s}^{-1} \text{ km}^{-2}$ ,  $CV=0.52$ ,  $CS=1.28$ ), the standard error and bias of the CS estimate are about 0.56 and 0.22 (simulation), respectively, which is about half and one sixth of the underlying population moment (assuming a GEV-distribution as the data-generating process). This bias and uncertainty for the estimation of skewness are well documented in Wallis et al. (1974), Bobee and Robitaille (1975) and Carney (2016), for example. “

We also recognize the work that has been done in the USA on regional skewness coefficients. Unfortunately we do not have a map of estimated regional skewness coefficients for Europe. We plan to add the following sentence to the paper.

“Additionally, combining regional with local information can help reducing the estimation uncertainty of statistical moments of flood series, as demonstrated by the weighted skewness approaches in the US (Griffis and Stedinger, 2009) and the flood frequency hydrology approach (Viglione et al., 2013), but this is beyond the scope of this paper. “

*NONSTATIONARITY AND ITS POTENTIAL IMPACTS ON MOMENTS MUST BE CONSIDERED. Blöschl et al. (2019) reported regional-scale climate-driven trends in northwestern, southern, and eastern Europe (see Fig. 1). Is it worthwhile to describe the sample moments of sites without considering these changes? In my opinion, the authors should either develop a procedure to exclude sites subject to trends or provide a rationale for treating all sites as stationary given their research goals.*

*In making this decision, the authors should consider the ongoing shift from nival to pluvial regimes in 3/5 regions in Europe makes this an important consideration. If they wish to distinguish trends from long-term persistence, an argument often used to refute nonstationary treatments of hydrologic records, the authors could test for trends of a given trajectory against null hypotheses of long-term persistence (see Matalas and Sankarasubramanian, 2003; Cohn et al., 2005). The authors should also note trends in both the mean and variance affect both Cv and Cs estimates [see Serago and Vogel (2018) for some initial guidance for making these adjustments]. Hecht and Vogel (2020) offer one approach for modeling trends in variability and reference a handful of other moment-based ones, including Strupczewski et al. (2001).*

Thank you for pointing this out. In this paper we have adopted a pragmatic approach. We are interested in the statistical flood moments for the period 1960-2010 and trends

are not in the center of our interest, because they have already been comprehensively analyzed by others.

Indeed, the focus of the models in Blöschl, Hall et al. (2019) and this paper are different. We are interested in providing a large-scale analysis of European flood data, using all the data available to use. Of course it would be possible to extend the analysis to non-stationary moments and interpret their behavior with respect to their spatial controls, but this is beyond the scope of this study. Of course, non-stationarity, or persistence, affects the properties of all estimators used in this study. We plan to add the following sentence to section 2.3, pointing out this issue.

“In interpreting the results, we do not account for any non-stationarities of the flood moments, as the focus is on the aggregated behavior during the observation period. Any autocorrelation that may be present will increase the uncertainty of the estimates, although they are usually small in annual flood data, and are therefore rarely considered in flood frequency estimation (Hosking and Wallis, 2005). “

*THE RESIDUAL BEHAVIOR OF THE REGRESSION MODELS MUST BE EVALUATED. The authors do not report the normality, heteroscedasticity, autocorrelation of their residuals. They also do not report the variance inflation factor or alternatives measures of multicollinearity for their multiple regression equations. This is especially important if one is making process-based inferences using covariate matrix-derived statistics from regression models. The authors should consider using a Supporting Information (SI) section to display the residual behavior of their models. Also, the authors report the tendency for large MAFs to be underestimated and small ones to be overestimated. This suggests that residuals might not be homoscedastic and that another covariate may be needed to produce a multiple regression model that meets the homoscedasticity requirement for making inferences from standard error-based metrics (Helsel et al., 2020).*

Thank for pointing this out. These are all interesting analysis, but given that the paper is already long, we prefer to focus on the physical interpretation of the spatial patterns of the moments.

Of course, checking the assumptions of a linear regression model is important for making accurate statistical inferences. However, the aim of the regression models in this study is not to perform statistical inferences or provide optimal predictions, but rather to serve as a baseline for more sophisticated analysis. If the assumption of homoscedasticity, no autocorrelation or normality of the error term is not met, the OLS-estimator remains consistent for large samples (e.g. Proposition 2.1 in Hayashi, 2000). Of course the violation of these assumptions will affect the distribution of the OLS-estimator and therefore temper with inferences, such as hypothesis tests.

However, as we prefer to focus on the physical interpretation of the spatial patterns of the moments rather than testing formal statistical hypothesis about the regression models, we feel that the additional material on diagnostics on the regional regression models would perhaps not be needed and overload the paper.

What remains a crucial assumption is the assumption of no multicollinearity. As suggested by the referee, we now report the maximum variance inflation factor of the respective regression model in tables A.1 and A.2. Collinearity between potential explanatory variables for the regression models is also investigated in section 3.4, where interpretations of these relationships are discussed, which guided the selection of variables for the regression analysis to minimize collinearity.

*THE CHOICE BETWEEN LOG-SPACE VS. REAL-SPACE MOMENTS SHOULD BE RECOGNIZED. The authors should also recognize in their manuscript that moments of log-transformed floods are often used in FFA and clarify that real-space moments are used upfront.*

We plan to add the following sentence to section 2.3, emphasizing that real-space moments of flood series are analyzed in this manuscript.

“While sometimes log-transformed variables are used in flood frequency analysis (Griffis and Stedinger, 2007), here we analyze real space moments of flood series, in line with European practice (e.g. Merz and Blöschl, 2009). “

*MIXED POPULATIONS SHOULD BE CONSIDERED IN THEIR INTERPRETATION OF RESULTS. While the authors somewhat recognize mixed populations (e.g. description of Alps and Norwegian coast flood-generating processes), they compute moments assuming floods at each site belong to homogenous populations. While statistically evaluating the presence of mixed populations at individual sites lies beyond the scope of this paper, it is important to consider mixed populations explicitly when interpreting results and to caution readers about problems associated with choices to neglect them at individual sites. While the authors use an analysis of flood timing to help identify drivers of floods, they do not specifically check for the presence of multi-modal peaks suggesting mixed distributions in them. This type of quicker analysis could support some of the good observations that authors make about mixed distributions in specific regions. Finally, the authors should communicate an awareness of this ‘mixed populations’ literature in their discussion of mixed populations.*

Thank you for pointing this out. Indeed, analyzing mixed populations of floods unfortunately is beyond the scope of this manuscript, as the data is simply lacking. We plan to add the following sentence to the manuscript, discussing this issue

“Further analysis could consider different subpopulations of floods. Time series may contain floods with different genesis mechanisms (Tarasova et al., 2019), which can also be seen by their seasonality (Hall et al., 2018). An approach based on mixed distributions (e.g. Fischer et al., 2016), could yield additional insights into the spatial patterns of flood moments of mixed populations. “

*MORE DETAILS ABOUT THE DRAINAGE AREA-NORMALIZED EQUATION(S) ARE NEEDED. I like the authors’ idea of normalizing their analysis to a given drainage area (100 km<sup>2</sup>) since drainage area is still an important descriptor of flood-generating processes even when specific discharge values are used to express peak flows. However, it would be nice to report goodness-of-fit measures for this model and show the fit graphically, the latter which can be done in the SI section if space constraints remain. The authors also describe the creation of equations that establish values of the  $C_v$  and  $C_s$  for 100-km<sup>2</sup> drainage areas, but it is unclear if these DA-adjusted values are ever evaluated as response variables in the multiple regression models.*

Thank you for pointing this out. Goodness-of-fit measures for this model are now reported in the appendix in Table A.6. The fit of the models is shown graphically in figure 4.

The equations for  $C_V$  and  $C_S$  are established alongside the equation for  $MAF$ , as pointed out by the referee. We believe that we state that  $MAF$  instead of  $MAF_\alpha$  is used for the

regression models in line 397: ‘We used MAF, rather than MAF<sub>a</sub>, in order to avoid prior assumptions regarding the role of catchment area.’

*NON-MONOTONIC RELATIONSHIPS WITH COVARIATES SHOULD BE CHECKED - AT LEAST IN AN EXPLORATORY DATA ANALYSIS.* The authors raise the possibility of non-monotonic relationships between moments and catchment descriptors in discussions of prior findings, but they only examine monotonic relationships in their linear regression models. In particular, they cite Smith et al. (1992), who found that floods in the Appalachian mountains in the eastern US demonstrated an increase in the CV with catchment area for catchments up to 100 km<sup>2</sup> and then exhibited a decrease with catchment area in larger basins. They also recognize that Wang et al. (2017) found a non-monotonic relation between water body size and the Cv. In addition, Pallard et al. (2009) also found that Cv decreases with drainage density in catchments with sparse drainage networks but then increase after a reaching a minimum. I think that if the authors can claim that exploratory data analyses did not demonstrate any non-monotonic trajectories like these, they don't need to formally test hypotheses of non-monotonic change with statistical models, but they should briefly demonstrate that they performed exploratory data analysis (EDA) justifying the monotonic relationships they modeled.

Thank you for pointing this out. While we agree, that non-monotonic relationships with covariates could be present in the data and would be interesting to analyze, we feel that this would require a separate subsection in section 3 and go beyond the scope of the paper. We therefore plan to include the possibility of non-monotonous relationships in the discussion section instead.

“While here we examined monotonic relationships and linear relationships, it would also be worth to explore non-monotonic relationships between flood moments and covariates (see e.g. Blöschl and Sivapalan, 1997; Smith, 1992; Pallard et al., 2009). “

*DOES ARIDITY CAUSE FLOOD VARIABILITY?* The authors make an important association between the aridity index (AI) and the Cv of annual floods. However, it is important to recognize more succinctly that arid regions tend to have greater interannual precipitation variability, and, for that reason, arid basins tend to have larger Cv's. This is important when considering the implications of these findings under climate change. If a region becomes drier, it's interannual precipitation variability will not necessarily increase. A discussion about the implications of these cross-sectional findings for projecting flood responses of environmental changes at a given location over time would enrich the paper.

Thank you for pointing this out. We plan to modify text in the introduction in the following way.

“Based on data from around the world, Farquharson et al. (1992) found CV to increase with the Aridity Index (the ratio of potential evaporation and MAP). This dependency may be the result of at least two processes. On the one hand, low and variable runoff coefficients tend to increase the flood CV far beyond that of rainfall (Viglione et al., 2009). On the other hand, the CV of rainfall (variability between years) is also sometimes larger in arid regions than in more humid regions (Fatichi et al., 2012). “

*ORDINARY KRIGING.* Ordinary kriging visualizes broad regional patterns but may be limited for applications in ungauged basins. The kriging results look visually pleasing and achieve the goal of illustrating broad regional patterns in flood moments. However, what if nearby basins have greatly different drainage areas (since this is stated to be a map of MAF and not

*MAF[alpha]) or pronounced differences in other catchment characteristics that can change abruptly? In the future, the authors could consider kriging in attribute space instead of geographic space. If the authors retain these kriged maps to display broad regional patterns, they should note the limitations of using these interpolations for characterizing flood regimes at ungauged sites. To me, it seems like the regression equations should work reasonably well for estimating moments at many sites. And if they choose to argue that kriging can be used to estimate moments in ungauged basins, then a more formal cross-validation analysis and more detailed reporting of model performance is necessary. Alternatively, they could turn this kriging exercise into a separate paper.*

Thank you for pointing this out. Ordinary kriging for regionalizing floods has already been extensively cross-validated in different areas of the world (e.g. Rosbjerg et al., 2013). We therefore prefer not to add a cross-validation of the kriging results for space reasons. The intention of figure 10 is to offer a quick visual comparison between the two regionalization approaches. We agree that, before the use of ordinary kriging estimates for applications in ungauged basins, additional cross-validations would be useful. We plan to add the following sentence to section 3.6 to discuss the limitations of this result.

“The intention of figure 10 is to offer a visual comparison between the two regionalization approaches. Before the use of ordinary kriging estimates for applications in ungauged basins, additional cross-validations would be useful in the spirit of Rosbjerg et al. (2013). “

*IMPORTANCE FOR FFA IN PRACTICE. This paper successfully elucidates broad regional patterns in flood moments across Europe. Their leave-one-out cross-validation suggests that flood moments can be reasonably estimated in many regions at sites whose covariate values are known. The implications of these errors for design flood estimates could be made stronger by computing the design floods with a GEV quantile function (noting issues with this distribution in specific regions from prior studies, such as Salinas et al. (2014)) using moments estimated from observations and from the multiple regression models. The authors should also address practical concerns regarding nonstationarity described above. In addition, the authors should note the contribution that their study makes to improve upon other recent prediction in ungauged basins efforts in Europe.*

Thank you for pointing this out. We agree that the regression results can provide a baseline for more sophisticated studies on regional flood frequency analyses in Europe, which however, is not the aim of the current paper. Estimating flood quantiles would be a natural subsequent step after the regional estimation of moments, but also lies beyond the scope of the present study. Regarding the nonstationarity we plan to add the following sentence to section 4.3:

“The process controls identified here can assist in choosing suitable covariates, both for stationary and nonstationary flood frequency models. “

*OVERALL PRESENTATION. The paper reads a bit like a lab report in places and generally has the potential to be shortened considerably without losing much content. In some places, starting paragraphs with more topic sentences could help orient the reader better and curtail the ‘rambling’ nature of some sections, such as the bivariate correlation results. The correlation analysis is important for interpreting regression model results and many of the insights on multicollinearity in the data are good, but the presentation of it should be a bit more focused on supporting the multiple regression model analysis and not a comprehensive review*

*of the entire correlation matrix. The submission also requires more editing for fluidity/conciseness and proper punctuation. While I made some writing and grammar suggestions in the Track Changes document, I did not perform a comprehensive check for these issues and suggest that the authors find someone else who can do that.*

Thank you for the detailed suggestions, which we really appreciate. We followed most of the suggestions, which we believe have strengthened the paper. Additionally we have condensed the section on the correlation results slightly and have had the paper proof-read. In addition, Hess papers are all copy-edited, so any small English inaccuracies will be taken care of.



First column is the number of comment, second column is the line in the annotated pdf, third is the comment of the referee, fourth is the response, fifth are the text changes

|     |    | <b>Review comments</b>                                                                                                                                                                                                                       | <b>Response</b>                                                                                                                   | <b>Text change</b>                                                                                                                                                                                                                                                                                                            |
|-----|----|----------------------------------------------------------------------------------------------------------------------------------------------------------------------------------------------------------------------------------------------|-----------------------------------------------------------------------------------------------------------------------------------|-------------------------------------------------------------------------------------------------------------------------------------------------------------------------------------------------------------------------------------------------------------------------------------------------------------------------------|
| A1  | 14 | Instantaneous or daily flows? Minimally impacted basins?                                                                                                                                                                                     | Suggestion adopted                                                                                                                | The data consist of maximum annual flood discharge series observed in 2370 catchments in Europe covering the period 1960-2010. Both instantaneous peak flows as well as daily mean flows served as the basis for deriving annual maximum flows, and series with strong human modifications were not included in the analysis. |
| A2  | 15 | Mention that these values vary widely due to catchment size, climate and other covariates. In my opinion, it's not necessary to state this in the abstract but there's nothing wrong with it either.                                         | Suggestion adopted                                                                                                                | On the scale of Europe the estimated moments MAF, CV and CS vary widely due to catchment size, climate and other controls, and their averages are 0.17 m <sup>3</sup> s <sup>-1</sup> km <sup>-2</sup> , 0.52 and 1.28, respectively.                                                                                         |
| A3  | 19 | Due to the greater sensitivity of sampling variability to Cs in short records?<br>See general comments about regional skewness.                                                                                                              | Explanation added                                                                                                                 | The pattern of CS is similar to that of CV, albeit a little more erratic, due to the greater sampling variability of CS for short records.                                                                                                                                                                                    |
| A4  | 21 | Can you state why briefly?                                                                                                                                                                                                                   | Explanation added                                                                                                                 | .. weaker mainly due to the effect of snow melt.                                                                                                                                                                                                                                                                              |
| A5  | 26 | Do you need to describe this here? You already did above.                                                                                                                                                                                    | Sentence deleted as suggested                                                                                                     |                                                                                                                                                                                                                                                                                                                               |
| A6  | 26 | Is it aridity itself or do arid regions happen to greater interannual precipitation variability?                                                                                                                                             | Both rainfall and runoff generation are considered as relevant and this is discussed in more detail in the main part of the paper |                                                                                                                                                                                                                                                                                                                               |
| A7  | 27 | You already said that they are relevant in most of Europe earlier on in this paragraph                                                                                                                                                       | Sentence deleted as suggested                                                                                                     |                                                                                                                                                                                                                                                                                                                               |
| A8  | 35 | Scientific?                                                                                                                                                                                                                                  | Changed to scientific                                                                                                             |                                                                                                                                                                                                                                                                                                                               |
| A9  | 38 | Storm events in general? Not always T-storms.                                                                                                                                                                                                | Changed thunderstorm to storm                                                                                                     |                                                                                                                                                                                                                                                                                                                               |
| A10 | 44 | See Pallard et al. (2009) on the effect that drainage density has on the Cv<br><a href="https://hess.copernicus.org/articles/13/1019/2009/hess-13-1019-2009.pdf">https://hess.copernicus.org/articles/13/1019/2009/hess-13-1019-2009.pdf</a> | We are discussing here a slightly different point, i.e. CV as a function of area rather than drainage density                     |                                                                                                                                                                                                                                                                                                                               |

|     |    |                                                                                                                                                                                                                                                          |                                                                                                                                                                                                                                                                                              |                                                                                                                                                                                                                                                                                                                                                                                                                                                                                                                          |
|-----|----|----------------------------------------------------------------------------------------------------------------------------------------------------------------------------------------------------------------------------------------------------------|----------------------------------------------------------------------------------------------------------------------------------------------------------------------------------------------------------------------------------------------------------------------------------------------|--------------------------------------------------------------------------------------------------------------------------------------------------------------------------------------------------------------------------------------------------------------------------------------------------------------------------------------------------------------------------------------------------------------------------------------------------------------------------------------------------------------------------|
| A11 | 48 | Floods from synoptic-scale precip events (e.g. frontal systems)?                                                                                                                                                                                         | Changed as suggested                                                                                                                                                                                                                                                                         | such as floods from synoptic-scale precipitation events (e.g. frontal systems) and snowmelt                                                                                                                                                                                                                                                                                                                                                                                                                              |
| A12 | 53 | Many USGS regional flood frequency studies based on observed data have revealed non-climatic controls.                                                                                                                                                   | Suggestion adopted                                                                                                                                                                                                                                                                           | While USGS regional flood frequency studies based on observed data have revealed non-climatic controls (e.g. England et al., 2019) most knowledge                                                                                                                                                                                                                                                                                                                                                                        |
| A13 | 58 | Attributing?                                                                                                                                                                                                                                             | Suggestion adopted                                                                                                                                                                                                                                                                           | Attributing                                                                                                                                                                                                                                                                                                                                                                                                                                                                                                              |
| A14 | 64 | Consider stating this one first                                                                                                                                                                                                                          | Order of sentences changed                                                                                                                                                                                                                                                                   |                                                                                                                                                                                                                                                                                                                                                                                                                                                                                                                          |
| A15 | 66 | Also, MAP might be better than event precip in places with snowmelt-driven floods                                                                                                                                                                        | Yes, probably, but we did not look at this specifically.                                                                                                                                                                                                                                     |                                                                                                                                                                                                                                                                                                                                                                                                                                                                                                                          |
| A16 | 68 | Is it aridity itself or does this stem from the tendency of more arid catchments to have greater interannual precipitation variability?                                                                                                                  | In general, probably both increased rainfall CV and smaller (and more variable) runoff coefficients may be relevant. The latter process is clearly sufficient to produce high flood CVs (e.g. Viglione et al., 2009), and larger rainfall CV may further contribute to increasing flood CVs. | Farquharson et al. (1992) found CV to increase with the aridity Index (the ratio of potential evaporation and MAP). This dependency may be the result of at least two processes. On the one hand, low and variable runoff coefficients tend to increase the flood CV far beyond that of rainfall (Viglione et al., 2009). On the other hand, the CV of rainfall (variability between years) is also sometimes larger in arid regions than in more humid regions (Fatichi et al, 2012). Merz and Blöschl (2009) found ... |
| A17 | 69 | The greater the PET, the higher the Cv in lowlands of Austria?                                                                                                                                                                                           | Suggestion adopted                                                                                                                                                                                                                                                                           | and CV in the lowlands of Austria (the greater the PET, the higher the CV), which they interpreted in terms                                                                                                                                                                                                                                                                                                                                                                                                              |
| A18 | 71 | This sounds very interesting, but could you explain in a sentence or two why Cv becomes lower with higher DA's in basins where infiltration-excess flow dominates and why it becomes higher with DA in basins where saturation-excess flow predominates? | We have reworded the sentence slightly to make it clearer. The findings result from the model structure and is not directly apparent from the reference cited.                                                                                                                               | Iacobellis et al. (2002), found that CV behaviour is controlled mainly by the long-term climate and the infiltration characteristics at the catchment scale. Specifically, they suggest that in arid and impermeable catchments CV tends to decrease with area because the infiltration excess (Horton type) mechanism dominates while in humid and vegetated catchments CV tends to increase with area because the saturation excess mechanism dominates.                                                               |

|     |     |                                                                                                                                                                           |                                                                                                                                                                                                                                                                                                                                                                                             |                                                                                                                                                                                                                                                                                                 |
|-----|-----|---------------------------------------------------------------------------------------------------------------------------------------------------------------------------|---------------------------------------------------------------------------------------------------------------------------------------------------------------------------------------------------------------------------------------------------------------------------------------------------------------------------------------------------------------------------------------------|-------------------------------------------------------------------------------------------------------------------------------------------------------------------------------------------------------------------------------------------------------------------------------------------------|
| A19 | 94  | Please describe the degree to which and the types of anthropogenic perturbations to which basins in your sample are subject.                                              | More detailed description has been added                                                                                                                                                                                                                                                                                                                                                    | The time series were manually checked for strong human modifications such as reservoirs (Blöschl, Hall et al., 2019 and Hall et al., 2015) and include both rain floods and snowmelt floods (Kemter et al., 2020).                                                                              |
| A20 | 95  | Assuming instantaneous peaks?                                                                                                                                             | More detailed description has been added                                                                                                                                                                                                                                                                                                                                                    | Annual maximum discharges were derived from instantaneous peak flows and daily mean flows for each calendar year.                                                                                                                                                                               |
| A21 | 101 | Total days or wet days?                                                                                                                                                   | More detailed description has been added                                                                                                                                                                                                                                                                                                                                                    | Extreme precipitation is quantified by the daily rainfall rate that is not exceeded in 95% of the days of the year, ...                                                                                                                                                                         |
| A22 | 102 | The duration of precipitation to examine varies substantially by region and catchment size. Can you convey an awareness of this in your introduction of these covariates? | Yes, in smaller, flashier catchments one would expect shorter rainstorms to be more relevant.                                                                                                                                                                                                                                                                                               | and the long-term mean of the maximum 2-day precipitation of each year. While the duration of event precipitation to examine varies with catchment size and characteristics due to differences in response times (Gaál et al, 2012) we chose a constant value of two days here for consistency. |
| A23 | 103 | How accurate are these modeled values? Can you add a sentence or so stating this and any places where inaccurate estimates may distort your analyses?                     | Modified as suggested                                                                                                                                                                                                                                                                                                                                                                       | Fan and Van Den Dool (2004) discuss any biases of the data set, which may distort some of the findings here.                                                                                                                                                                                    |
| A24 | 106 | Can you mention forest and water body categories here?                                                                                                                    | Modified as suggested                                                                                                                                                                                                                                                                                                                                                                       | Land use was quantified as the percentage of total catchment area and includes forest areas and water bodies                                                                                                                                                                                    |
| A25 | 111 | Proper name?                                                                                                                                                              | Yes                                                                                                                                                                                                                                                                                                                                                                                         | Data Base on European Floods                                                                                                                                                                                                                                                                    |
| A26 | 117 | Check for change?                                                                                                                                                         | URL is correct as of now                                                                                                                                                                                                                                                                                                                                                                    |                                                                                                                                                                                                                                                                                                 |
| A27 | 131 | What about lower-altitude streamgages draining primarily alpine catchments? How often is this an issue? Generally, it looks like you have a reasonable alpine region      | Low altitude streamgages draining primarily alpine catchments are an issue in the largest river basins analysed here, for example the Danube at Vienna (elevation 150m a.s.l) while the mean catchment elevation is 785 m due to alpine tributaries such as the Inn. Only for 65 catchments the difference between mean elevation and catchment elevation is more than 1000m so this is not | its stream gauge. The latter is usually representative of the entire catchment; only for 65 catchments the difference between stream gauge elevation and mean catchment elevation is more than 1000m so this is not generally considered an issue.                                              |

|     |     |                                                                                                                                                                   |                                                                                                                                                                                             |                                                                                                                                                                               |
|-----|-----|-------------------------------------------------------------------------------------------------------------------------------------------------------------------|---------------------------------------------------------------------------------------------------------------------------------------------------------------------------------------------|-------------------------------------------------------------------------------------------------------------------------------------------------------------------------------|
|     |     |                                                                                                                                                                   | generally considered an issue. One possibility to address this issue would be to exclude the largest basins, but then the analysis with respect to catchment area would be less meaningful. |                                                                                                                                                                               |
| A28 | 132 | Make NE region color standout more. Its shade of blue is too similar to the dark green lowlands and plentiful blue lakes of this region                           | We have modified the colours to make the points stand out more                                                                                                                              |                                                                                                                                                                               |
| A29 | 147 | Is there a reference describing the computations you made?                                                                                                        | No, these figures were obtained by a simple simulation, so should be easily reproducible by the reader                                                                                      | standard error and bias of the CS estimate are about ... (simulation)                                                                                                         |
| A30 | 148 | In your discussion, consider commenting on Salinas et al. (2014) who investigated how well the GEV distribution performed throughout Europe                       | We believe that the focus of this paper is somewhat different, i.e. on analyzing the flood moments rather than the choice of distribution function.                                         |                                                                                                                                                                               |
| A31 | 152 | Transforming both sides logarithmically before fitting?<br>How well did this equation fit the data? Please present goodness-of-fit stats and a graphic in the SI. | Yes.<br><br>The goodness-of-fit statistics of this equation are now presented in the appendix (Table A.6). Additionally the goodness-of-fit can be seen from Figure 4.                      | were found by ordinary least squares regression in the logarithmic space.                                                                                                     |
| A32 | 163 | Log-log? Where both the independent and dependent variables are log-transformed?                                                                                  | Yes                                                                                                                                                                                         | Specifically, we estimated the dependence of MAF, CV and CS on catchment area from Eq. (5) and analogous equations for CV and CS, transforming all variables logarithmically. |
| A33 | 164 | Nice. Try to emphasize this throughout the paper a bit more.                                                                                                      | We have checked the potential of emphasizing this more throughout the paper and believe we already have the right balance.                                                                  |                                                                                                                                                                               |
| A34 | 169 | Nice description. Did you formally test any hypotheses related to seasonality using circular stats?                                                               | We did not. Hall and Blöschl (2018) are testing this.                                                                                                                                       |                                                                                                                                                                               |

|     |     |                                                                                                                                                                                                                                                                                                                                                                                                                                                                                                                                                                                                           |                                                                                                                                                                                                                                |                                                                              |
|-----|-----|-----------------------------------------------------------------------------------------------------------------------------------------------------------------------------------------------------------------------------------------------------------------------------------------------------------------------------------------------------------------------------------------------------------------------------------------------------------------------------------------------------------------------------------------------------------------------------------------------------------|--------------------------------------------------------------------------------------------------------------------------------------------------------------------------------------------------------------------------------|------------------------------------------------------------------------------|
| A35 | 174 | And are a limitation of the regression analysis?                                                                                                                                                                                                                                                                                                                                                                                                                                                                                                                                                          | Generally speaking, one of the potential limitations of a linear regression analysis.                                                                                                                                          |                                                                              |
| A36 | 180 | Just the explanatory variables? Or also the peak flows?                                                                                                                                                                                                                                                                                                                                                                                                                                                                                                                                                   | Explanation added as suggested                                                                                                                                                                                                 | MAF, CV, A and P95 were log-transformed, as their distributions were skewed. |
| A37 | 187 | Can you note which ones were excluded in SI or Git repo?                                                                                                                                                                                                                                                                                                                                                                                                                                                                                                                                                  | These catchments are distributed throughout Europe, but given they are few, listing them is perhaps not needed.                                                                                                                |                                                                              |
| A38 | 201 | Good. Can you mention earlier that you log-transformed the moment values after computing them in real-space? (At least this is what it sounds like you did)                                                                                                                                                                                                                                                                                                                                                                                                                                               | Has now been mentioned earlier                                                                                                                                                                                                 |                                                                              |
| A39 | 203 | Are subscripts missing here or is this a pdf conversion issue                                                                                                                                                                                                                                                                                                                                                                                                                                                                                                                                             | This seems to be a Pdf conversion issue                                                                                                                                                                                        |                                                                              |
| A40 | 205 | The kriging results look visually pleasing and reveal broad spatial patterns, but what if nearby basins have greatly different drainage areas or pronounced diffs in other catchment characteristics that can change abruptly? In the future, you could consider kriging in attribute space instead if all your covariates can be gridded. In this paper (or another one), you should consider stating the limitations of this kriging analysis and perform a split-sample validation experiment to see how well it does at ungaged locations. You could also take this out and make it a separate paper. | Yes. Comparisons of ordinary kriging with alternative regionalization methods have been performed in the past (e.g. Merz and Blöschl, 2005). It would certainly be worth to conduct similar comparisons at the European scale. |                                                                              |
| A41 | 214 | Consider showing histograms                                                                                                                                                                                                                                                                                                                                                                                                                                                                                                                                                                               | Instead we are giving the spatial distribution of the moments. Some information on the distribution can also be inferred from Figure 4.                                                                                        |                                                                              |

|     |     |                                                                                                                                          |                                                                                                                                                                                                     |                                                                                               |
|-----|-----|------------------------------------------------------------------------------------------------------------------------------------------|-----------------------------------------------------------------------------------------------------------------------------------------------------------------------------------------------------|-----------------------------------------------------------------------------------------------|
| A42 | 225 | In other words, most of the variability lies within the regions and not between them.                                                    | Sentence modified as suggested                                                                                                                                                                      | i.e. much of the variability lies within the regions and not between them                     |
| A43 | 226 | Something to think about: how much of the partitioning would the regions explain if you considered of basins different sizes separately? | We conducted preliminary analysis of this question and the statistics do not change much if one stratifies by catchment area.                                                                       |                                                                                               |
| A44 | 230 | Does this mean that you have larger catchments in some regions than others?                                                              | This comment does not refer to regions but to the patterns across all of Europe                                                                                                                     | slightly more homogeneous spatial patterns across Europe than MAF, as the effect of catchment |
| A45 | 234 | Flashy mountainous watersheds with high rainfall                                                                                         | Comment added                                                                                                                                                                                       | Large as well, partly because of flashy mountainous catchments with high rainfall             |
| A46 | 235 | Consider mentioning the extremely low $R^2$ here                                                                                         | We are mentioning it now.                                                                                                                                                                           | (which can also be seen from the low $R^2$ in Table 2)                                        |
| A47 | 239 | Interesting since $C_s$ is normalized by $sd^3$ . An increase in $sd$ raises $C_v$ but lowers $C_s$ .                                    | We believe this is already clear.                                                                                                                                                                   |                                                                                               |
| A48 | 264 | Is this variability mainly due to snow cover, melt timing or also rain-on-snow events?                                                   | This variability is probably due to the majority of floods being driven by snow melt and some by rain-on-snow events, but further analyses would be required to ascertain these processes in detail |                                                                                               |
| A49 | 264 | Is their CV large due to interannual snowpack variability? Timing issues with spring thaws? Mixture of spring rains and snowmelt?        | The large CV is probably due to the majority of floods being driven by snow melt and some by rain-on-snow events, but further analyses would be required to ascertain these processes in detail     |                                                                                               |
| A50 | 280 | Snow or rain-driven? Or both?                                                                                                            | Again, this would require more detailed analyses.                                                                                                                                                   |                                                                                               |
| A51 | 283 | Nice figure                                                                                                                              |                                                                                                                                                                                                     |                                                                                               |
| A52 | 287 | I like these circled areas                                                                                                               |                                                                                                                                                                                                     |                                                                                               |
| A53 | 297 | Good obs                                                                                                                                 |                                                                                                                                                                                                     |                                                                                               |
| A54 | 299 | Could the paucity of small basins in Central-Eastern Europe contribute to the positive relation between $C_s$ and basin area there?      | Yes, this is a possibility (and one of the reasons we are giving basin area in Table 3), another reason are snow processes.                                                                         |                                                                                               |
| A55 | 316 | 95th percentile daily precipitation                                                                                                      | We believe that 'daily precipitation not exceeded                                                                                                                                                   |                                                                                               |

|     |     |                                                                                                                                                 |                                                                                                                                                                                                                                                                           |                                                                                                                                                                                                                          |
|-----|-----|-------------------------------------------------------------------------------------------------------------------------------------------------|---------------------------------------------------------------------------------------------------------------------------------------------------------------------------------------------------------------------------------------------------------------------------|--------------------------------------------------------------------------------------------------------------------------------------------------------------------------------------------------------------------------|
|     |     |                                                                                                                                                 | 95% of the time' is sufficiently clear                                                                                                                                                                                                                                    |                                                                                                                                                                                                                          |
| A56 | 322 | Check correlation between precipitation and forest cover                                                                                        | We did, and correlations on the order of 0.4 are typical in Europe, mainly because forests are mainly left in the mountains that tend to have higher precipitation (Fig. 5)                                                                                               |                                                                                                                                                                                                                          |
| A57 | 330 | In which region are the largest basins?                                                                                                         | There is a tendency for the Central-Eastern region to have larger basins (Table 3) although the largest basins occur in various regions (Figure 4)                                                                                                                        |                                                                                                                                                                                                                          |
| A58 | 336 | Good                                                                                                                                            |                                                                                                                                                                                                                                                                           |                                                                                                                                                                                                                          |
| A59 | 345 | Explain a bit more. How might snowmelt temper this correlation?                                                                                 | We are now explaining the argument in more detail.                                                                                                                                                                                                                        | more important role of snowmelt there, given that snowmelt floods tend to occur at the same time over large areas, so one would expect a smaller reduction of flood peaks due to spatial averaging than for rain floods. |
| A60 | 368 | Not sure this is necessary to report in the text.                                                                                               | This brief text (i.e. –r). may perhaps clarify the argument for some readers                                                                                                                                                                                              |                                                                                                                                                                                                                          |
| A61 | 379 | Good observation. I suggest adding a sentence saying that this should NOT suggest that deforestation reduces floods.                            | Sentence added                                                                                                                                                                                                                                                            | through orographic effects, implying that the positive correlation cannot be interpreted as deforestation reducing floods.                                                                                               |
| A62 | 381 | Explain this in terms of infiltration being greater in coarser soils, which tend to be more permeable                                           | We are explaining this later in the discussion section but an explanation is not straightforward as the permeability will affect both the mean and the standard deviation of the flood peaks.                                                                             |                                                                                                                                                                                                                          |
| A63 | 384 | Is it worth going to into so much detail about the bivariate correlations when there are so many confounding factors, as you seem to recognize? | We believe that the bivariate correlations are a first step to support the analysis. While there are indeed many confounding factors that bivariate correlations have the additional advantage of usually more robust estimates as compared to multivariate correlations. |                                                                                                                                                                                                                          |
| A64 | 388 | Suggest adding dark vertical lines to separate                                                                                                  | Vertical grey lines have been added                                                                                                                                                                                                                                       |                                                                                                                                                                                                                          |

|     |     |                                                                                                                                                                                                                                      |                                                                                                                                                                                                                                                       |                                                                                                                                                                                                                          |
|-----|-----|--------------------------------------------------------------------------------------------------------------------------------------------------------------------------------------------------------------------------------------|-------------------------------------------------------------------------------------------------------------------------------------------------------------------------------------------------------------------------------------------------------|--------------------------------------------------------------------------------------------------------------------------------------------------------------------------------------------------------------------------|
|     |     | each region's results if possible                                                                                                                                                                                                    |                                                                                                                                                                                                                                                       |                                                                                                                                                                                                                          |
| A65 | 397 | Not normalized by area at all?                                                                                                                                                                                                       | Normalized by area, i.e. specific flow, rather than allowing for an areal dependence. MAF is given in Equation (1)                                                                                                                                    |                                                                                                                                                                                                                          |
| A66 | 398 | Is it worth including so much about Cs then?                                                                                                                                                                                         | The treatment of CS in the paper is a compromise in that we are providing some of the results, but not to the same extent as for MAF and CV for the reasons stated                                                                                    |                                                                                                                                                                                                                          |
| A67 | 400 | What is the water balance group?<br>Look at interaction effects?                                                                                                                                                                     | The water balance group has now been explained                                                                                                                                                                                                        | water balance (i.e. SM, PET and AI) by one covariate                                                                                                                                                                     |
| A68 | 413 | Perhaps a proxy variable for snowmelt-driven floods is needed there<br>Also, do smaller headwater basins in the Alpine region have more snow cover and, if so, do they generate larger floods than larger ones with less snow cover? | Not all the floods in the Alpine region are necessarily snow melt driven. Yes, smaller headwater basins tend to have more snow cover because of higher elevations, but this does not generally translate into higher floods (Merz and Blöschl, 2003). | the R <sup>2</sup> of the model in the Alpine region is low, which may be a reflection of the hydrological heterogeneity of the area, involving snow melt, rain-on-snow and rain driven floods (Merz and Blöschl, 2003). |
| A69 | 417 | Good interpretation                                                                                                                                                                                                                  |                                                                                                                                                                                                                                                       |                                                                                                                                                                                                                          |
| A70 | 427 | Please put all regional R <sup>2</sup> in parentheses as you describe them in the text. Also, it might help to put this table in the main text. Check for other instances of this throughout the manuscript.                         | We followed this suggestion and put the R <sup>2</sup> in parenthesis where mentioned                                                                                                                                                                 |                                                                                                                                                                                                                          |
| A71 | 428 | Please tell readers how higher winter temperatures lead to lower Cv's here                                                                                                                                                           | The explanation is complex and probably related to the rainfall regime. We have reworded the sentence to make it more general.                                                                                                                        | Atlantic region are partly aligned with higher winter temperatures.                                                                                                                                                      |
| A72 | 432 | Good analysis                                                                                                                                                                                                                        |                                                                                                                                                                                                                                                       |                                                                                                                                                                                                                          |
| A73 | 441 | If insignificant no sign shown? Please clarify this.                                                                                                                                                                                 | The signs are shown if the variable is included in the model in the stepwise selection procedure                                                                                                                                                      |                                                                                                                                                                                                                          |
| A74 | 444 | This suggests that you have heteroscedastic residuals, and that you haven't explained an important component of the variance in your data.                                                                                           | Yes, the model does not explain the full variance. It would be interesting to test more complex models in order to avoid these estimation biases.                                                                                                     |                                                                                                                                                                                                                          |



|     |     |                                                                                                                                                                                                                  |                                                                                                                                                                                                                                                                     |                                                                                                                                                                         |
|-----|-----|------------------------------------------------------------------------------------------------------------------------------------------------------------------------------------------------------------------|---------------------------------------------------------------------------------------------------------------------------------------------------------------------------------------------------------------------------------------------------------------------|-------------------------------------------------------------------------------------------------------------------------------------------------------------------------|
| A75 | 448 | You mean LUW was not considered here...not any sort of man-made regulation                                                                                                                                       | We did not consider land use here to render the model more parsimonious. The data set consists of catchments with minimum man-made regulations; analyses with an extended data set (including regulated catchments) would be an interesting extension of this work. |                                                                                                                                                                         |
| A76 | 451 | British Isles (Great Britain + Ireland)? Or the island of Great Britain?                                                                                                                                         | This should read British Isles                                                                                                                                                                                                                                      | British Isles                                                                                                                                                           |
| A77 | 453 | Throughout Europe?                                                                                                                                                                                               | Added as suggested                                                                                                                                                                                                                                                  | throughout Europe                                                                                                                                                       |
| A78 | 458 | Consider using a trichromatic legend where one color gets stronger as the errors become more negative, a neutral color indicates where errors are low, and a third color becomes stronger as error get positive. | We tested numerous possibilities and for the given map the colour scale chosen seemed optimal to us as it emphasizes the absolute values of the error and yet allows identification of the sign with lower priority.                                                |                                                                                                                                                                         |
| A79 | 467 | List these in SI. I assume these were left out of the kriging analysis as well.                                                                                                                                  | These catchments are distributed throughout Europe, but given they are few, listing them is perhaps not needed. We have removed the associated sentence.                                                                                                            |                                                                                                                                                                         |
| A80 | 492 | Are these storm tracks more regular?                                                                                                                                                                             | They produce more variable precipitation                                                                                                                                                                                                                            | influence of Mediterranean storm tracks associated with high variability of extreme precipitation (Hofstätter et al., 2018, Hofstätter and Blöschl, 2019) perhaps along |
| A81 | 500 | Explain a bit more                                                                                                                                                                                               | We have added more information                                                                                                                                                                                                                                      | mostly high CV due to the more non-linear runoff generation as compared to wetter regions.                                                                              |
| A82 | 515 | Good commentary about consistency with other studies                                                                                                                                                             |                                                                                                                                                                                                                                                                     |                                                                                                                                                                         |
| A83 | 516 | From large frontal systems?                                                                                                                                                                                      | Changed as suggested                                                                                                                                                                                                                                                | large-scale precipitation from large frontal systems as would be expected                                                                                               |
| A84 | 522 | Will the thresholds vary more in larger basins due to their greater environmental heterogeneity? Also,                                                                                                           | They will be smoothed out according to this reasoning. Yes, spatiotemporal aggregation effects may perhaps increase the rainfall                                                                                                                                    | as threshold processes associated with Hortonian runoff generation or soil storage homogeneity may be more relevant in small catchments while in large                  |

|     |     |                                                                                                                                                                                                     |                                                                                                                                                                                                                                                                                         |                                                                                                                                                                                                                                                                                                                             |
|-----|-----|-----------------------------------------------------------------------------------------------------------------------------------------------------------------------------------------------------|-----------------------------------------------------------------------------------------------------------------------------------------------------------------------------------------------------------------------------------------------------------------------------------------|-----------------------------------------------------------------------------------------------------------------------------------------------------------------------------------------------------------------------------------------------------------------------------------------------------------------------------|
|     |     | consider spatiotemporal aggregation effects.                                                                                                                                                        | return period at which the thresholds become relevant.                                                                                                                                                                                                                                  | catchments these threshold effects may be smoothed out, and spatiotemporal aggregation may introduce additional scale effects (Penna et al., 2011; Rogger et al. 2012).                                                                                                                                                     |
| A85 | 531 | Can you show a figure of this in your regions?                                                                                                                                                      | Figure 4 gives an indication of this relationship                                                                                                                                                                                                                                       |                                                                                                                                                                                                                                                                                                                             |
| A86 | 543 | Because more of the between-region variability is explained by hydroclimatic differences, which makes sense given that the regions are intended to represent distinct hydroclimatic zones in Europe | We believe this is not so much a result of a subdivision into regions as climate explains the flood moments both through the region subdivision and the covariates. Rather it has to do with the continental scale where climate differences can be much larger than those in a region. | important at the European scale than at the regional scale. This finding is likely related to the larger spatial variability of climate variables within European than within a region.                                                                                                                                     |
| A87 | 548 | What exactly do you mean by landscape evolution?                                                                                                                                                    | Explained as suggested                                                                                                                                                                                                                                                                  | soil moisture and the geomorphological processes of landscape evolution that affect runoff generation and routing, whereas                                                                                                                                                                                                  |
| A88 | 554 | This paragraph is comprehensive but a bit too long and reads like a lab report.                                                                                                                     | Reworded as suggested                                                                                                                                                                                                                                                                   | capturing antecedent soil moisture less. While regional studies in Greece and Austria have suggested that MAP is a better predictor of MAF than other precipitation variables (Mimikou and Gordios, 1989; Merz and Blöschl, 2009) this does not seem to be the case at the European scale. CV is always a better correlated |
| A89 | 558 | Because the antecedent soil moisture conditions tend to vary more than they do in humid catchments?                                                                                                 | Yes. Explanation added                                                                                                                                                                                                                                                                  | because the antecedent soil moisture conditions tend to vary more than they do in humid catchments, so some of the events may be a combination of both large precipitation and wet initial conditions such producing much larger floods than usual                                                                          |
| A90 | 602 | Good pt                                                                                                                                                                                             |                                                                                                                                                                                                                                                                                         |                                                                                                                                                                                                                                                                                                                             |
| A91 | 611 | Show this?                                                                                                                                                                                          | Yes. Explanation added                                                                                                                                                                                                                                                                  | decreasing CV beyond as shown by Wang et al., 2017)                                                                                                                                                                                                                                                                         |
| A92 | 618 | Nice analysis.                                                                                                                                                                                      |                                                                                                                                                                                                                                                                                         |                                                                                                                                                                                                                                                                                                                             |
| A93 | 632 | What values did they obtain? For which regions?                                                                                                                                                     | We have added the requested information                                                                                                                                                                                                                                                 | similar, but smaller scale studies in the literature of flood regionalization, that typically give ANE of 0.35 for the 100yr                                                                                                                                                                                                |

|      |     |                                                                                                                                                                                                                                                                                                     |                                                                                                      |                                                                                                                                                                                                                                                                                                                                                                                                                                                                                            |
|------|-----|-----------------------------------------------------------------------------------------------------------------------------------------------------------------------------------------------------------------------------------------------------------------------------------------------------|------------------------------------------------------------------------------------------------------|--------------------------------------------------------------------------------------------------------------------------------------------------------------------------------------------------------------------------------------------------------------------------------------------------------------------------------------------------------------------------------------------------------------------------------------------------------------------------------------------|
|      |     |                                                                                                                                                                                                                                                                                                     |                                                                                                      | specific flood and smaller values for the MAF (Salinas et al., 2013; Rosbjerg et al., 2013). The fit of the                                                                                                                                                                                                                                                                                                                                                                                |
| A94  | 635 | Change term                                                                                                                                                                                                                                                                                         | Changed as suggested                                                                                 | model applicable to all regions of Europe.                                                                                                                                                                                                                                                                                                                                                                                                                                                 |
| A95  | 637 | If I understood you correctly, didn't you say earlier that these regions reflected general hydroclimatic properties rather than flood-generating processes in particular?                                                                                                                           | Wording adjusted to make consistent with that in section 2.2                                         | previous climatic partitions of Europe and guided by flood seasonalities rather than optimal predictive performance                                                                                                                                                                                                                                                                                                                                                                        |
| A96  | 637 | Mention this earlier                                                                                                                                                                                                                                                                                | We now mention this in section 2.2                                                                   |                                                                                                                                                                                                                                                                                                                                                                                                                                                                                            |
| A97  | 639 | Is it worth mentioning that the lack of importance of land-surface characteristics in explaining the spatial variability of floods over large regions of Europe should not be construed to mean that land-surface perturbations have a second-order effect at individual sites compared to climate? | Mentioned as suggested                                                                               | predictive power of variables related to land use, soil and geology for hydrological quantities that one would expect to be very relevant at individual sites (Merz and Blöschl, 2009, Rogger et al., 2017),                                                                                                                                                                                                                                                                               |
| A98  | 659 | Can you describe this in simpler language a bit so a wider range of readers who are not familiar with Perdigo and Blöschl can understand this?                                                                                                                                                      | We have added more detail in simpler language                                                        | This is because of the space-time asymmetry discussed in Perdigo and Blöschl (2014), i.e. the fact that, because of the celerity of coevolution, spatial and temporal statistics are not necessarily the same. For example, based on data in Austria, Perdigo and Blöschl (2014) found that a 1% increase in precipitation as one moves in space leads to a 2.3% increase in flood peaks, while the same increase in precipitation as one moves in time leads to an increase of only 0.6%. |
| A99  | 662 | Good pt...expand on it a bit more                                                                                                                                                                                                                                                                   | We have added more detail in simpler language (see above)                                            |                                                                                                                                                                                                                                                                                                                                                                                                                                                                                            |
| A100 | 669 | Can you give an example of such a coevolutionary index earlier on?                                                                                                                                                                                                                                  | We have explained the asymmetry associated with the coevolutionary index in more detail above (A98). |                                                                                                                                                                                                                                                                                                                                                                                                                                                                                            |

|      |     |                                                                                                                                                                                                                                                                 |                                                                                                                                  |  |
|------|-----|-----------------------------------------------------------------------------------------------------------------------------------------------------------------------------------------------------------------------------------------------------------------|----------------------------------------------------------------------------------------------------------------------------------|--|
|      |     | I would add a few more of your key accomplishments in this paper to the last paragraph as well as a sentence or two regarding more general future directions, and not a specific focus on coevolution. See ideas about nonstationarity and mixed distributions. | The key accomplishments of this paper are summarized earlier in the same section                                                 |  |
| A101 | 680 | Residual normality?                                                                                                                                                                                                                                             | We have added to Tables A.1 and A.2 the variance inflation factor which we consider more important in the context of this paper. |  |
| A102 | 709 | Consider using CREDIT system.                                                                                                                                                                                                                                   | Given this is a simple paper, the CRediT (Contributor Roles Taxonomy) of 14 roles is perhaps not needed.                         |  |

## References

- Bobee, B., R. Robitaille (1975) Correction of bias in the estimation of the coefficient of skewness, *Water Resour. Res.*, doi: 10.1029/WR011i006p00851
- Carney, M.C. (2016), Bias correction to GEV shape parameters used to predict precipitation extremes, doi: 10.1061/(ASCE)HE.1943-5584.0001416
- Cohn, T.A., H.F. Lins (2005), Nature's style: naturally trendy, *Geophys. Res. Lett.*, 32, L23402, doi:1029/2005GL024476
- England, J.F., Jr., Cohn, T.A., Faber, B.A., Stedinger, J.R., Thomas, W.O., Jr., Veilleux, A.G., Kiang, J.E., and Mason, R.R., Jr., 2019, Guidelines for determining flood flow frequency—Bulletin 17C (ver. 1.1, May 2019): U.S. Geological Survey Techniques and Methods, book 4, chap. B5, 148 p., <https://doi.org/10.3133/tm4B5>.
- Fan, Y., & Van Den Dool, H. (2004). Climate Prediction Center global monthly soil moisture data set at 0.5 resolution for 1948 to present. *Journal of Geophysical Research: Atmospheres*, 109(D10).
- Faticchi, S., Ivanov, V. Y., & Caporali, E. (2012). Investigating interannual variability of precipitation at the global scale: Is there a connection with seasonality?. *Journal of climate*, 25(16), 5512-5523.
- Fischer, S., Schumann, A., & Schulte, M. (2016). Characterisation of seasonal flood types according to timescales in mixed probability distributions. *Journal of Hydrology*, 539, 38-56.
- Griffis, V. W., & Stedinger, J. R. (2007). Log-Pearson type 3 distribution and its application in flood frequency analysis. I: Distribution characteristics. *Journal of Hydrologic Engineering*, 12(5), 482-491.
- Griffis, V. W., & Stedinger, J. R. (2009). Log-Pearson Type 3 distribution and its application in flood frequency analysis. III: Sample skew and weighted skew estimators. *Journal of Hydrologic Engineering*, 14(2), 121-130.
- Hayashi, F., (2000), *Econometrics*, Princeton University Press.
- Hecht, J.S., R.M. Vogel (2020), Updating urban design floods for changes in central tendency and variability using regression, doi:10.1016/j.advwatres.2019.103484
- Helsel, D.R., Hirsch, R.M., Ryberg, K.R., Archfield, S.A., and Gilroy, E.J., 2020, *Statistical methods in water resources: U.S. Geological Survey Techniques and Methods*, book 4, chapter A3, 458 p., <https://doi.org/10.3133/tm4a3>. [Supersedes USGS Techniques of Water-Resources Investigations, book 4, chapter A3, version 1.1.]
- Hosking, J. R. M., & Wallis, J. R. (2005). *Regional frequency analysis: an approach based on L-moments*. Cambridge university press.
- Matalas, N.C., A. Sankarasubramanian (2003), Effect of persistence on trend detection via regression, *Water Resour. Res.*, doi:10.1029/2003WR002292.
- Merz R. and G. Blöschl (2003) A process typology of regional floods. *Water Resources Research*, 39 (12), article number 1340.
- Merz, R., & Blöschl, G. (2005). Flood frequency regionalisation—spatial proximity vs. catchment attributes. *Journal of Hydrology*, 302(1-4), 283-306.
- Merz, R., & Blöschl, G. (2009). Process controls on the statistical flood moments—a data based analysis. *Hydrological Processes: An International Journal*, 23(5), 675-696.

- Pallard, B., A. Castellarin, and A. Montanari (2009), A look at the links between drainage density and flood statistics, *Hydrol. Earth Syst. Sci.*, 13, 1019-1029, doi:10.5194/hess-13-1019-2009
- Rosbjerg, D., G. Blöschl, D. H. Burn, A. Castellarin, B. Croke, G. DiBaldassarre, V. Jacobellis, T. R. Kjeldsen, G. Kuczera, R. Merz, A. Montanari, D. Morris, T. B. M. J. Ouarda, L. Ren, M. Rogger, J. L. Salinas, E. Toth, A. Viglione (2013) Prediction of floods in ungauged basins. Chapter 9 in: G. Blöschl, M. Sivapalan, T. Wagener, A. Viglione, H. Savenije (Eds.) *Runoff Prediction in Ungauged Basins - Synthesis across Processes, Places and Scales*. Cambridge University Press, Cambridge, UK, pp. 135-162.
- Salinas, J.L., G. Laaha, M. Rogger, J. Parajka, A. Viglione, M. Sivapalan and G. Blöschl (2013) Comparative assessment of predictions in ungauged basins; Part 2: Flood and low flow studies. *Hydrology and Earth System Sciences*, 17, 2637-2652, doi: 10.5194/hess-17-2637-2013
- Salinas, J.L., A. Castellarin, A. Viglione, S. Kohnova, and T.R. Kjeldsen (2014), Regional parent flood frequency distributions in Europe – part 1: is the Gev model suitable as a pan-European parent? *Hydrol. Earth Syst. Sci.*, 18, 4381-4389, doi: 10.5194/hess-18-4381-2014
- Serago, J.M., R.M. Vogel (2018), Parsimonious nonstationary flood frequency analysis, *Adv. Water Resour.*, 112, 1-16, doi: 10.1016/j.advwatres.2017.11.026
- Strupczewski, W., Z. Kaczmarek (2001), Non-stationary approach to at-site flood frequency modelling II. Weighted least squares estimation, *J. Hydrol.*, 248(1-4), 143-151, doi: 10.1016/S0022-1694(01)00398-5
- Tarasova, L., Merz, R., Kiss, A., Basso, S., Blöschl, G., Merz, B., ... & Wietzke, L. (2019). Causative classification of river flood events. *Wiley Interdisciplinary Reviews: Water*, 6(4), e1353.
- Viglione, A., R. Merz and G. Blöschl (2009) On the role of the runoff coefficient in the mapping of rainfall to flood return periods, *Hydrology and Earth System Sciences*, 13 (5) 577 - 593.
- Viglione, A., Merz, R., Salinas, J. L., & Blöschl, G. (2013). Flood frequency hydrology: 3. A Bayesian analysis. *Water Resources Research*, 49(2), 675-692.
- Wallis, J.R., N.C. Matalas, J.R. Slack (1974) Just a moment! *Water Resour. Res.*, doi: 10.1029/WR010i002p00211
- Ye, L., X. Gu, D. Wang, and R.M. Vogel. An unbiased estimator of coefficient of variation of streamflow. *J. Hydrol.*, 594, doi: 10.1016/j.jhydrol.2021.125954
