# Supplementary material for: Characteristics and process controls of statistical floodmoments in Europe – a data based analysis
Source: Copernicus journal article supplement (doi:10.5194/hess-2020-600), 2020-12-10
Supplement: Supplementary file [file hess-2020-600-RC2-supplement.pdf]

# Characteristics and process controls of statistical flood moments in Europe – a ~~data~~-data-based analysis

David Lun<sup>1</sup>, Alberto Viglione<sup>2</sup>, Miriam Bertola<sup>1</sup>, Jürgen Komma<sup>1</sup>, Juraj Parajka<sup>1</sup>, Peter Valent<sup>1,3</sup>, Günter Blöschl<sup>1</sup>

- 5 <sup>1</sup>Institute of Hydraulic Engineering and Water Resources Management, Vienna University of Technology, Vienna, Austria  
<sup>2</sup>Department of Environment, Land and Infrastructure Engineering, Politecnico di Torino, Turin, Italy  
<sup>3</sup>Department of Land and Water Resources Management, Faculty of Civil Engineering, Slovak University of Technology, Bratislava, Slovakia
- 10 Correspondence to: David Lun (lun@hydro.tuwien.ac.at)

**Abstract.** This paper analyses the spatial patterns and process controls of the mean annual flood (MAF), coefficient of variation (CV) and skewness (CS) of flood discharges in Europe. The data consist of maximum annual flood discharge series observed in 2370 catchments in Europe covering the period 1960-2010. On average, in Europe, the estimated moments MAF, CV and CS are  $0.17 \text{ m}^3 \text{ s}^{-1} \text{ km}^{-2}$ , 0.52 and 1.28, respectively.

The results indicate that MAF is largest along the Atlantic coast, the high rainfall areas of the Mediterranean coast and in the mountain ranges of Europe mountainous regions, while it is smallest in the sheltered parts of the East European plain. The CV is largest in Southern-southern and Eastern-eastern Europe, while it is smallest in the regions subject to strong Atlantic influence. The pattern of CS is similar to that of CV, albeit a little more erratic. In the Mediterranean, MAF, CV and CS decrease strongly with catchment area, suggesting that floods in small catchments are relatively very large, while in Eastern Europe the this dependence is much weaker.

The Process-process controls on the flood moments in five predetermined hydroclimatic regions are identified by through correlation and multiple linear regression analyses with a range of covariates. Precipitation-related variables covariates are found to be the main controls of the spatial patterns of MAF in most of Europe except for the regions with where-in which snow melt contributes to MAFs influence, where air temperature is more important. Catchment area is another relevant variable. The Aridity Index is, by far, the most important control of on the spatial pattern of CV in all of Europe. Precipitation related variables are relevant in Southern Europe. Overall, the findings suggest that, at the continental scale, climate variables dominate over land surface characteristics, such as land use and soil type, in controlling the spatial patterns of flood moments.

30 Finally, the estimation accuracy of the regional multiple linear regression models for estimating flood moments in ungauged basins is evaluated as provides an accuracy baseline for more accurate local studies.

## 1. Introduction

Understanding the spatial distribution of statistical flood characteristics is important from both practical and theoretical perspectives, assisting in estimating design floods in gauged and ungauged catchments, and shedding light on the regional processes of flood generation from a probabilistic perspective (Rosbjerg et al., 2013).

**Commented [A1]:** Instantaneous or daily flows? Minimally impacted basins?

**Commented [A2]:** Mention that these values vary widely due to catchment size, climate and other covariates. In my opinion, it's not necessary to state this in the abstract but there's nothing wrong with it either.

**Commented [A3]:** Due to the greater sensitivity of sampling variability to CS in short records?

See general comments about regional skewness.

**Commented [A4]:** Can you state why briefly?

**Commented [A5]:** Do you need to describe this here? You already did above.

**Commented [A6]:** Is it aridity itself or do arid regions happen to greater interannual precipitation variability?

**Commented [A7]:** You already said that they are relevant in most of Europe earlier on in this paragraph.

**Commented [A8]:** Scientific?

Much research has been conducted on identifying process variables and mechanisms controlling the magnitudes of flood characteristics. Catchment area usually is the main control on the specific mean annual flood (MAF) as smaller basins tend to have larger specific MAFs than larger ones (Rosbjerg et al., 2013). ~~This is~~ because a large basin is less likely to be fully covered by a thunderstorm than a small basin. This which tends to reduce the variance of extreme catchment-average precipitation and thus the MAF

**Commented [A9]:** Storm events in general? Not always T-storms.

40 (Viglione et al., 2010a, b). Additionally, there is an important space-time effect that explains the attenuation of specific floods as catchment areas increase. Event-scale catchment response times tend to increase with area (Gaál et al. 2012), which leads to a greater attenuation of the flood peaks. Meanwhile, The effect of catchment area on the CV (the ratio of standard deviation and annual means) tends to be more complex. For example, Smith (1992), based on data in the Appalachian region, found an increase in CV with catchment area up to about 100 km<sup>2</sup>, and subsequently a decrease, which he explained by attributed to the spatial organisation of precipitation

**Commented [A10]:** See Pallard et al. (2009) on the effect that drainage density has on the Cv  
<https://hess.copernicus.org/articles/13/1019/2009/hess-13-1019-2009.pdf>

45 and downstream changes in the floodplain system. Blöschl and Sivapalan (1997) suggested that space-time scale interactions may be the main reason for this-of-the scale dependence, while Merz and Blöschl (2003) noted that the strength of the dependence of CV on area will differ between regions of-with different prevailing flood generation types such as synoptic floods and snowmelt-snowmelt-driven floods. Based on an analysis of flood data in Slovakia,

**Commented [A11]:** Floods from synoptic-scale precip events (e.g. frontal systems)?

Austria and Italy, Salinas et al. (2014b) found both CV and CS to decrease with catchment area, which they  
50 interpreted as the result of aggregation effects of the spatial heterogeneity of rainfall and the interaction between the spatial and temporal scales of rainfall and catchment size.

Runoff generation and thus flood moments are also controlled by soil characteristics, geology and land-use. Most of-the knowledge on-of these effects comes from simulation studies. For example, Gioia et al. (2012) demonstrated that infiltration and soil storage strongly affect the flood moments, and Brath et al. (2006)

**Commented [A12]:** Many USGS regional flood frequency studies based on observed data have revealed non-climatic controls.

55 performed a similar analysis for-the-case-of-on land use. The role of these variables can, to some extent, be inferred from their use as covariates in flood frequency regionalisation (see, e.g. Zaman et al., 2012; Rosbjerg et al., 2013; Miller and Brewer, 2018). However, the type of soil, geology and land-use data available at the regional scale is often not consistent with the level of detail required for quantifying runoff generation processes, and therefore correlations with flood characteristics tend to be low (Weingartner et al., 2003).

**Commented [A13]:** Attributing?

60 Another important control is climate. Mechanistically, one would expect extreme precipitation to represent flood characteristics, as it is usually the main driver at the event scale (Viglione et al., 2009). However, many studies have shown that mean annual precipitation (MAP) is a better predictor of MAF (e.g. Madsen et al., 1997; Reed et al., 1999; Merz and Blöschl, 2009) for which a number of reasons have been suggested: MAP is usually highly correlated to-with event precipitation; MAP is an important control of antecedent soil moisture on a seasonal

**Commented [A14]:** Consider stating this one first

65 scale (e.g. Grillakis et al., 2016); and climate, vegetation, soils and land-forms may co-evolve with MAP, thus exerting a longer-longer-term influence (Gaál et al., 2012, Perdigão and Blöschl, 2014). Based on data from around the world, Farquharson et al. (1992) found CV to increase with the aAridity Index (the ratio of potential evaporation and MAP), and Merz and Blöschl (2009) found potential evaporation to be an excellent predictor of both MAF

**Commented [A15]:** Also, MAP might be better than event precip in places with snowmelt-driven floods

**Commented [A16]:** Is it aridity itself or does this stem from the tendency of more arid catchments to have greater interannual precipitation variability?

and CV in the lowlands of Austria, which they interpreted in terms of the increasing non-linearity of the rainfall-runoff process.

**Commented [A17]:** The greater the PET, the higher the Cv in lowlands of Austria?

70 with aridity. Iacobellis et al. (2002), found that CV behaviour is controlled mainly by the long-term climate and the abstraction characteristics at the catchment scale. While a decrease in CV with the catchment area is attributed to more arid and impermeable catchments where the infiltration excess (Horton type) mechanism dominates, as in arid and impermeable basins, an increase of CV with the catchment size area is attributed to humid and vegetated catchments with dominant saturation excess runoff generation.

**Commented [A18]:** This sounds very interesting, but could you explain in a sentence or two why Cv becomes lower with higher DA's in basins where infiltration-excess flow dominates and why it becomes higher with DA in basins where saturation-excess flow predominates?

75 The climate controls, including rainfall, soil moisture and snowmelt are usually subject to strong seasonality. An analysis of the seasonality of floods (Bayliss and Jones, 1993; Merz and Blöschl, 2003) has therefore been an efficient way to shed light on the interaction of these processes. For example, based on a the seasonality of 4262 catchments in Europe, Blöschl et al. (2017) and Hall et al. (2018) identified extreme winter precipitation in northwestern Europe, snowmelt in northeastern and eastern Europe and summer precipitation and snowmelt in 80 the Alpine regions of Europe to be important flood drivers. Using their data set, Berghuijs et al. (2019) found soil moisture excess to explain flood seasonality better than other variables, such as extreme precipitation, particularly in the western part of Europe, in line with a similar study in the United States (Berghuijs et al., 2016).

While substantial understanding of regional flood controls has been achieved in the past, few studies have 85 analysed large, consistent data sets of flood discharges in terms of their statistical moments. Large data sets provide the opportunity to obtain more robust and generalisable findings than studies containing a smaller number of catchments. The aim of this paper is therefore to identify the continental scale patterns of flood moments and their controls across Europe. We use a data set of flood discharges of 2370 catchments across Europe for the period 1960-2010 and apply correlation and regression analyses to identify climatic and 90 catchment process controls on the moments.

## 2. Data and Methodology

### 2.1 Data

This study uses the data set of European flood discharges of Blöschl, Hall et al. (2019), which can be found in 95 their supplementary material. It consists of 2370 annual maximum peak discharge series from 33 countries. Catchment areas range from 5 to 100,000 km<sup>2</sup>, with a median of 383 km<sup>2</sup>. The observation period is 1960 to 2010, and record lengths range from 30 to 51 years, with a median of 51 years.

**Commented [A19]:** Please describe the degree to which and the types of anthropogenic perturbations to which basins in your sample are subject.

**Commented [A20]:** Assuming instantaneous peaks?

In order to analyse process controls, a range of catchment attributes and climatic indicators are used. In addition to catchment area, we used catchment-averaged climate indicators, including long-term mean annual 100 precipitation (MAP), long-term mean potential evaporation (PET) and the aridity index, PET/MAP. Extreme precipitation is quantified by the daily rainfall rate that is not exceeded in 95% of the days, and the long-term mean of the maximum 2-day precipitation of each year. As a proxy for snowmelt we used the mean air temperature in spring (MAM) and winter (DJF). Soil moisture was taken from the CPC Soil moisture database, which contains model-calculated soil moisture values. We used the mean of the annual maximum monthly

**Commented [A21]:** Total days or wet days?

**Commented [A22]:** The duration of precipitation to examine varies substantially by region and catchment size. Can you convey an awareness of this in your introduction of these covariates?

**Commented [A23]:** How accurate are these modeled values? Can you add a sentence or so stating this and any places where inaccurate estimates may distort your analyses?

105 values over the observation period. Topographical indicators include the mean catchment elevation and the mean topographical slope of each catchment. Land use was quantified by the as a percentage of land use classes total catchment area. Soil characteristics were quantified in terms of five soil-texture classified into five categories. The data used are summarised in Table 1.

Commented [A24]: Can you mention forest and water body categories here?

110 Table 1: Data used in this study including quantiles of the variables and source information. Sources:  
1Data base on European floods: [https://github.com/tuwhydro/europe\\_floods](https://github.com/tuwhydro/europe_floods)  
2CCM River and Catchment Database. Vogt et al., 2017. <https://data.europa.eu/>  
3E-OBS gridded dataset (v18.0e), 0.1 deg. Cornes et al., 2018. <https://www.ecad.eu/>  
4Global Aridity Index and Potential Evapo-Transpiration (ET0) Climate Database V2. Trabucco and Zomer, 2019  
[https://figshare.com/articles/Global\\_Aridity\\_Index\\_and\\_Potential\\_Evapotranspiration\\_ET0\\_Climate\\_Database\\_v2/7504448/3](https://figshare.com/articles/Global_Aridity_Index_and_Potential_Evapotranspiration_ET0_Climate_Database_v2/7504448/3)  
5CPC Soil Moisture (V2), NOAA Climate Prediction Center. Fan and Dool, 2004. <https://www.cpc.ncep.noaa.gov/>  
6Global Multi-resolution Terrain Elevation Data GMTED2010, 7.5 arc-seconds. <https://www.usgs.gov/>  
7Corine Land Cover (CLC) 2000, Version 20b2, <https://land.copernicus.eu/>

Commented [A25]: Proper name?

Commented [A26]: Check for change?

| Units                          | 25 / 50 / 75% quantiles         | Source                       |
|--------------------------------|---------------------------------|------------------------------|
|                                |                                 | Data base on                 |
| m <sup>3</sup> s <sup>-1</sup> | 0.06/0.11/0.22 km <sup>-2</sup> | European floods <sup>1</sup> |
| m <sup>3</sup> s <sup>-1</sup> | 0.08/0.16/0.28 km <sup>-2</sup> | Data base on                 |
|                                |                                 | European floods <sup>1</sup> |
| -                              | 0.36/0.46/0.61                  | Data base on                 |
|                                |                                 | European floods <sup>1</sup> |
| -                              | 0.62/1.09/1.69                  | Data base on                 |
|                                |                                 | European floods <sup>1</sup> |
| km <sup>2</sup>                | 135.90/382.80/1264.80           | CCM River and                |
|                                |                                 | Catchment                    |
|                                |                                 | Database <sup>2</sup>        |
| mm yr <sup>-1</sup>            | 621.28/798.69/1057.76           | EOBS <sup>3</sup>            |
| mm d <sup>-1</sup>             | 8.40/10.54/13.45                | EOBS <sup>3</sup>            |
|                                |                                 |                              |
| mm d <sup>-1</sup>             | 18.00/22.45/28.51               | EOBS <sup>3</sup>            |
| □C                             | 5.03/7.15/8.42                  | EOBS <sup>3</sup>            |
| □C                             | -3.35/-1.16/1.05                | EOBS <sup>3</sup>            |
| mm                             | 368.38/424.93/507.20            | CPC Soil                     |
|                                |                                 | Moisture (V2) <sup>5</sup>   |
| mm yr <sup>-1</sup>            | 749.02/817.73/897.98            | Global Aridity               |
|                                |                                 | Index and                    |
|                                |                                 | Potential Evapo-             |
|                                |                                 | Transpiration                |
|                                |                                 | (ET0) Climate                |
|                                |                                 | Database V2 <sup>4</sup>     |

120 <sup>8</sup>European Soil DataBase (ESDB), Soil Geographical DataBase (SGDB), unitless 0.72/1.00/1.25  
 TEXT\_SRF\_DOM, 10x10km. Panagos et al., 2012.

| Variable        | Symbol           | Data Description                                                                                                |                                                               |                | Global Aridity Index and Potential Evapo-Transpiration (ET0) Climate Database V2 <sup>4</sup> |
|-----------------|------------------|-----------------------------------------------------------------------------------------------------------------|---------------------------------------------------------------|----------------|-----------------------------------------------------------------------------------------------|
| <b>group</b>    |                  |                                                                                                                 |                                                               |                |                                                                                               |
| Flood           | MAF              | Mean annual specific flood                                                                                      |                                                               |                | GMTED2010 <sup>6</sup>                                                                        |
| Moments         | MAF <sub>α</sub> | Mean annual specific flood normalized to catchment area of α = 100km <sup>2</sup>                               | m a.s.l. 199.04/472.58/833.12<br>unitless 0.03/0.08/0.18<br>% |                | GMTED2010 <sup>6</sup><br>CORINE <sup>7</sup>                                                 |
|                 | CV               | Coefficient of variation of annual maximum flood peaks                                                          |                                                               |                |                                                                                               |
|                 | CS               | Coefficient of skewness of annual maximum flood peaks                                                           | %                                                             | 0/0.05/0.57    | CORINE <sup>7</sup>                                                                           |
| Catchment Area  | A                | Catchment area                                                                                                  | class                                                         | 1.77/2.00/2.25 | ESDB <sup>8</sup>                                                                             |
| Precipitation   | MAP              | Long-term mean annual precipitation                                                                             |                                                               |                |                                                                                               |
|                 | P95              | Daily precipitation rate, that is higher than what is observed on 95% of days in the observed period            |                                                               |                |                                                                                               |
|                 | Pmax             | Mean of maximum of 2-day precipitation of each year                                                             |                                                               |                |                                                                                               |
| Air temperature | Tspr             | Mean daily temperature in MAM (Celsius)                                                                         |                                                               |                |                                                                                               |
|                 | Twin             | Mean daily temperature in DJF (Celsius)                                                                         |                                                               |                |                                                                                               |
| Soil moisture   | SM               | Mean of annual maximum monthly soil moisture                                                                    |                                                               |                |                                                                                               |
| Evaporation     | PET              | Long-term mean potential evaporation                                                                            |                                                               |                |                                                                                               |
| Aridity         | AI               | Aridity index (PET/MAP)                                                                                         |                                                               |                |                                                                                               |
| Topography      | Elev             | Mean catchment elevations                                                                                       |                                                               |                |                                                                                               |
|                 | Slope            | Mean topographic slope (mean of tangent of angle of slope)                                                      |                                                               |                |                                                                                               |
| Land use        | LUF              | Fraction of catchment area covered by forest and seminatural areas                                              |                                                               |                |                                                                                               |
|                 | LUW              | Fraction of catchment area covered by water bodies                                                              |                                                               |                |                                                                                               |
| Soils           | Stex             | Dominant surface textural class of the STU (Soil Typological Unit), mean value of categories (1=coarse, 5=fine) |                                                               |                |                                                                                               |

## 2.2 Hydroclimatic regions

For the statistical analyses, Europe was subdivided into five regions based on ~~a particularization of~~ the eleven biogeographic regions of Roekaerts (2002) and guided by the flood seasonalities of Blöschl et al. (2017) and 125 Hall et al. (2018). In the Northeastern region, floods are mainly due to snowmelt during spring and early summer. The Atlantic region is characterised by mild, wet winters and cool, humid summers; floods mainly occur in winter following rain events. The Central-Eastern region has a continental climate with cold winters and warm summers and floods mainly occur in spring with snow-melt contributions. The Alpine region comprises ~~involves~~ the Alps and the Carpathians, where floods mainly occur in summer due to summer storms and/or snow melt. The Mediterranean region is characterised by hot, dry summers and mild, wet winters; floods occur in autumn and winter. For simplicity, each catchment was allocated to one of the regions according to the location of its stream gauge.

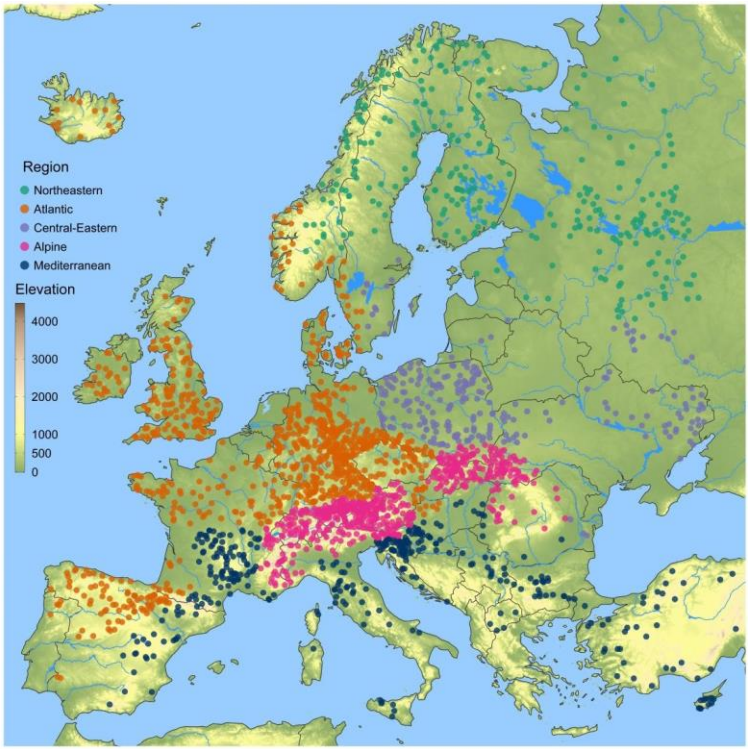

Figure 1: Location of the 2370 hydrometric stations analyzed. Colours of dots indicate five hydro-climatic regions (Northeastern, Atlantic, Central-Eastern, Alpine, Mediterranean). Background colour is elevation (m a.s.l.).

**Commented [A27]:** What about lower-altitude streamgages draining primarily alpine catchments? How often is this an issue? Generally, it looks like you have a reasonable alpine region

**Commented [A28]:** Make NE region color standout more. Its shade of blue is too similar to the dark green lowlands and plentiful blue lakes of this region

## 2.3 Analysis method

The statistical flood moments, the specific mean annual flood (MAF), the coefficient of variation (CV) and the coefficient of skewness (CS), were estimated from the annual maximum peak discharges series by:

$$MAF = \frac{1}{n} \sum_{i=1}^n Q_i \quad (1)$$

$$S^2 = \frac{1}{n-1} \sum_{i=1}^n (Q_i - MAF)^2 \quad (2)$$

$$CV = \frac{S}{MAF} \quad (3)$$

$$CS = \frac{n \sum_{i=1}^n (Q_i - MAF)^3}{(n-1)(n-2)S^3} \quad (4)$$

where  $Q_i$  is the annual maximum peak discharge of a record in year  $i$ , divided by the catchment area. Estimation uncertainty of the statistical flood moments decreases with record length and increases with the moment order.

145 While the estimation uncertainty of the mean is small, the uncertainty of CS can be substantial. For a record length of 50 years and a series with the average estimated moments of the entire dataset ( $MAF=0.17 \text{ m}^3 \text{ s}^{-1} \text{ km}^{-2}$ ,  $CV=0.52$ ,  $CS=1.28$ ), the standard error of the CS estimate is  $\Delta_{CS}=0.56$ , which is about half of the underlying true moment (assuming a GEV-distribution as the data-generating process). The estimation uncertainties need to be accounted for when interpreting the process controls on the flood moments. Since the specific mean annual

150 flood is often strongly controlled by catchment area which may mask other controls that vary regionally, we additionally also considered the specific mean annual flood,  $MAF_\alpha$ , normalised to a catchment area of  $\alpha=100 \text{ km}^2$

$$MAF_\alpha = MAF \alpha^{-\beta_{MAF}} \quad (5)$$

$MAF_\alpha$  and  $\beta_{MAF}$  were found by ordinary least squares regression.

In a first step First, we estimated what fraction of the spatial variability of the estimated flood moments can be

155 explained by subdividing Europe into five regions (Figure 1), using a simple one-way analysis of variance (ANOVA).

This can be interpreted as a simple regression model, where the dependent variables are the estimated flood moments and the only explanatory variables are indicators corresponding to the regional partition. The coefficient of determination of this model corresponds to the fraction of variance explained by the partition over the total variance in estimates of the flood moments.

160 In a second step Second, we evaluated the role of catchment area, since it is almost always the main control on the mean annual flood when examining a sample of catchments varying by orders of magnitude, and it reflects the aggregation behaviour of the floods and its their climatic and catchment controls. Specifically, we estimated the dependence of MAF, CV and CS on catchment area in a double logarithmic relationship from Eq. (5) and analogous equations for CV and CS.

In a third step Third, we conducted a seasonality analysis to assist in the process interpretations. We represented the

165 date of occurrence,  $D$ , of the maximum annual flood as a number from 1 to 365 (Julian dates) in polar coordinates on a unit

circle with angle  $\theta = D \frac{2\pi}{365}$ . For a flood series, the direction  $\theta$  of the average vector from the origin indicates the

**Commented [A29]:** Is there a reference describing the computations you made?

**Commented [A30]:** In your discussion, consider commenting on Salinas et al. (2014) who investigated how well the GEV distribution performed throughout Europe

[https://www.researchgate.net/publication/267865581\\_Regional\\_parent\\_flood\\_frequency\\_distributions\\_in\\_Europe\\_-\\_Part\\_1\\_Is\\_the\\_GEV\\_model\\_suitable\\_as\\_a\\_pan-European\\_parent](https://www.researchgate.net/publication/267865581_Regional_parent_flood_frequency_distributions_in_Europe_-_Part_1_Is_the_GEV_model_suitable_as_a_pan-European_parent)

**Commented [A31]:** Transforming both sides logarithmically before fitting? How well did this equation fit the data? Please present goodness-of-fit stats and a graphic in the SI.

**Commented [A32]:** Log-log? Where both the independent and dependent variables are log-transformed?

**Commented [A33]:** Nice. Try to emphasize this throughout the paper a bit more.



mean date of occurrence of the flood events around the year. The length of the vector from the origin is a measure of the variability of the date of occurrence, ranging from 0 (uniformly distributed across the year) to 1 (all events on the same day).

**Commented [A34]:** Nice description. Did you formally test any hypotheses related to seasonality using circular stats?

170 In a fourth step, we analysed the effects of individual hydro-climatic controls (see Table 1) on the spatial distribution of the flood moments. ~~We used the attributes of Table 1 for the analysis.~~ To assist in the interpretation, we first evaluated the Spearman rank correlation coefficients between the attributes, followed by an analysis of the Spearman rank correlation coefficients between the flood moments and the attributes. We used Spearman's rank correlation coefficients, as non-linear associations between variables are possible. The corresponding 175 significance tests for the estimates of Spearman's rho are employed with the assumption of an asymptotic t distribution under the ~~Null-null Hypotheses-hypotheses~~ (Gibbons and Chakraborti, 2010). The correlations were evaluated for all of Europe and the five regions separately.

**Commented [A35]:** And are a limitation of the regression analysis

In a fifth step we evaluated the effect of multiple controls on the flood moments. Multiple linear regression models were fitted to the estimated moments. The emphasis was on obtaining parsimonious models, therefore

180 the number of selected variables for a regression equation was limited to four. The variables were log-transformed if feasible. The attributes were selected according to a stepwise selection procedure (Weisberg, 2005). The criterion for model comparison was Mallows's Cp

**Commented [A36]:** Just the explanatory variables? Or also the peak flows?

$$C_p = \frac{RSS_p}{\hat{\sigma}^2} + 2p - n \quad (6)$$

where  $p$  refers to the number of coefficients in the current model including the intercept and  $n$  to the number of

185 observations.  $RSS_p$  is the residual sum of squares of the model being considered with  $p$  covariates and  $\hat{\sigma}^2$  is the residual error variance of the model including all possible covariates. For the comparisons of information criteria such as  $C_p$ , a complete set of observations is required, therefore 22 catchments, where some observations of covariates were not available, were excluded from this part of the analysis.

**Commented [A37]:** Can you note which ones were excluded in SI or Git repo?

In order to assess which of the covariates in each regression provided the most explanatory power, a dominance

190 analysis was conducted (Azen and Budescu, 2003). We used the measure for general dominance, which summarizes the average increase in the measure for the goodness of fit, when a given covariate is included in a regression model, for all possible model subsets for a fixed set of predictors. The sum of all measures for general dominance of each variable results in the  $R^2$  of the full regression. The general dominance measure (average contributions) provides a ranking of the variables in terms of their contributions to the fit of the models ( $R^2$ ).

195 However, this is only valid in the context of the model and the selected variables. These contributions can and most likely will change when variables are added to or subtracted from the regressions. To facilitate the interpretation of results, in section 3.5 we present the general dominance measure of individual covariates, divided by the  $R^2$  of the regression, and refer to this as the normalised general dominance measure. This does not affect the ranking of the variables.



200 In a sixth step the predictive accuracy of the fitted regression models was assessed in a leave-one-out cross-validation.

The errors are evaluated on the scale of the data, instead of the scale of the regression models (i.e. log scale) and normalized, e.g. in the case of the MAF:

$$ANE_{MAF} = \left| \frac{MAF - \hat{MAF}}{MAF} \right| \quad (7)$$

ANE stands for absolute normalized error.  $\hat{MAF}$  are the predictions of the regression models and MAF are the 205 at-site estimates. The analogous holds for CV.

In addition, ordinary kriging is used for interpolating the at-site estimates of flood moments (Cressie, 1993) and the interpolated values are contrasted with the predictions of regional regression models.

### 3. Results 210 3.1 Characteristics of flood moments

Table 2 shows the characteristics of the estimated flood moments for the five hydroclimatic regions and the entire data set. On average over the entire data set, the mean specific annual flood is  $0.17 \text{ m}^3 \text{ s}^{-1} \text{ km}^{-2}$ , while the mean specific annual flood normalised to a catchment area of  $100 \text{ km}^2$  ( $MAF_a$ ) is  $0.21 \text{ m}^3 \text{ s}^{-1} \text{ km}^{-2}$ . The latter is somewhat larger, as  $100 \text{ km}^2$  is smaller than the median catchment size of  $383 \text{ km}^2$ . On average over the entire

215 data set, the CV and CS are 0.52 and 1.28, respectively. The regions differ in terms of the moments. The largest average  $MAF_a$  occurs in the Alpine region and in the Mediterranean ( $0.30 \text{ m}^3 \text{ s}^{-1} \text{ km}^{-2}$ ). The smallest average  $MAF_a$  ( $0.05 \text{ m}^3 \text{ s}^{-1} \text{ km}^{-2}$ ) occurs in the Central Eastern region, but this is also the region where the average CV and CS are largest (0.69 and 1.59, respectively). On the other hand, the Northeastern region has the smallest average CV and CS (0.39 and 0.82, respectively).

220 The coefficient of determination  $R^2$  of the one-way ANOVA is an indicator of how much of the spatial variability is explained by the partitioning into the five regions. The partitioning explains 17% of the spatial variance of  $MAF_a$ , but only 9% and 5% of the spatial variance of CV, CS, respectively. This means that the spatial variability of CV and CS within the regions of CV and CS each region is similar to that over all of Europe. Part of that variability may be sampling uncertainty, but Figure 2 indicates that, at least for  $MAF_a$  and CV, there are clear spatial

225 patterns which, however, that are not aligned with the regions. As the regions have not been chosen to reflect flood magnitudes but a range of rather a range of hydro-climatic processes, this is not surprising.

The largest  $MAF_a$  occur in wet, mountainous regions, including the Alps, the Appenines (Italy), the Carpathian Flysch Belt, adjacent to the Ligurian and Adriatic Seas, the Languedoc, and the western coasts of Great Britain and Norway, which are all high-rainfall areas. The lowest  $MAF_a$  occurs in much flatter regions, such as the North and East European Plains, Dnieper Lowland, Finnish Lakeland and

230 southern Sweden and south-eastern England (Fig. 2c).  $MAF_a$  exhibits slightly more homogeneous spatial patterns than MAF, as the effect of catchment size has been removed. The spatial distribution of CV is, to some degree, a mirror image of that of  $MAF_a$ , as CV and  $MAF_a$  are slightly negatively correlated with a Spearman correlation coefficient of  $r = -0.12$  ( $-0.06$  for CV vs MAF). However, there are deviations from this general pattern. Along the

**Commented [A38]:** Good. Can you mention earlier that you log-transformed the moment values after computing them in real-space? (At least this is what it sounds like you did)

**Commented [A39]:** Are subscripts missing here or is this a pdf conversion issue?

**Commented [A40]:** The kriging results look visually pleasing and reveal broad spatial patterns, but what if nearby basins have greatly different drainage areas or pronounced diffs in other catchment characteristics that can change abruptly? In the future, you could consider kriging in attribute space instead if all your covariates can be gridded. In this paper (or another one), you should consider stating the limitations of this kriging analysis and perform a split-sample validation experiment to see how well it does at ungaged locations. You could also take this out and make it a separate paper.

**Commented [A41]:** Consider showing histograms

**Commented [A42]:** In other words, most of the variability lies within the regions and not between them.

**Commented [A43]:** Something to think about: how much of the partitioning would the regions explain if you considered of basins different sizes separately?

**Commented [A44]:** Does this mean that you have larger catchments in some regions than others?

Mediterranean coast between ~~Genua~~ Genoa, Italy and Valencia. CVs are rather large even though  $MAF_a$  are large ~~too~~ well. The

235 spatial ~~distribution coherence~~ of CS is less apparent, as roughly half the spatial variability is likely attributable to sampling variability (the standard error of the CS estimate for average parameters is  $\sigma_{CS} = 0.56$ ). However, there seems to exist a general pattern of larger than average CS along the Mediterranean coast and the mountainous areas of Europe, and smaller than average CS in Scandinavia and northern Russia. There is a strong positive Spearman correlation between ~~CS and CV (r=0.63)~~, which points towards non-linear runoff generation processes affecting

240 both CS and CV (Rogger et al., 2013), although, again, the correlation may be partly due to the sampling variability resulting in correlations between the estimators of CV and CS (see chapter 10 in Kendall and Stuart, 1969).

**Commented [A45]:** Flashy mountainous watersheds with high rainfall

**Commented [A46]:** Consider mentioning the extremely low  $R^2$  here

**Commented [A47]:** Interesting since Cs is normalized by  $sd^3$ . An increase in sd raises Cv but lowers Cs.

Table 2: Regional mean (m) and ~~regional~~ coefficient of variation (cv) of the mean annual specific flood ( $MAF$ , ( $m^3 s^{-1} km^{-2}$ )),

245 mean annual specific flood normalised to catchment area of  $100 km^2$  ( $MAF_a$ , ( $m^3 s^{-1} km^{-2}$ )), coefficient of variation (CV) and coefficient of skewness (CS) for the entire data set and the five regions. n is the number of stations per region.  $R^2$  is the fraction of the spatial variance explained by the partitioning into the five regions.

|         | Europe<br>(n=2370) |       | Northeastern<br>(n=288) |       | Atlantic<br>(n=875) |       | Central-<br>Eastern<br>(n=236) |       | Alpine<br>(n=622) |       | Mediterranean<br>(n=349) |       | $R^2$ |
|---------|--------------------|-------|-------------------------|-------|---------------------|-------|--------------------------------|-------|-------------------|-------|--------------------------|-------|-------|
|         | m                  | cv    | m                       | cv    | m                   | cv    | m                              | cv    | m                 | cv    | m                        | cv    |       |
| MAF     | 0.171              | 1.114 | 0.126                   | 0.939 | 0.137               | 0.981 | 0.037                          | 1.095 | 0.264             | 0.816 | 0.222                    | 1.223 | 0.140 |
| $MAF_a$ | 0.211              | 0.961 | 0.176                   | 0.655 | 0.166               | 0.875 | 0.047                          | 0.942 | 0.304             | 0.728 | 0.304                    | 0.938 | 0.173 |
| CV      | 0.518              | 0.492 | 0.386                   | 0.347 | 0.494               | 0.435 | 0.695                          | 0.583 | 0.516             | 0.381 | 0.571                    | 0.529 | 0.090 |
| CS      | 1.278              | 0.773 | 0.821                   | 0.779 | 1.216               | 0.882 | 1.59                           | 0.727 | 1.466             | 0.565 | 1.263                    | 0.785 | 0.047 |

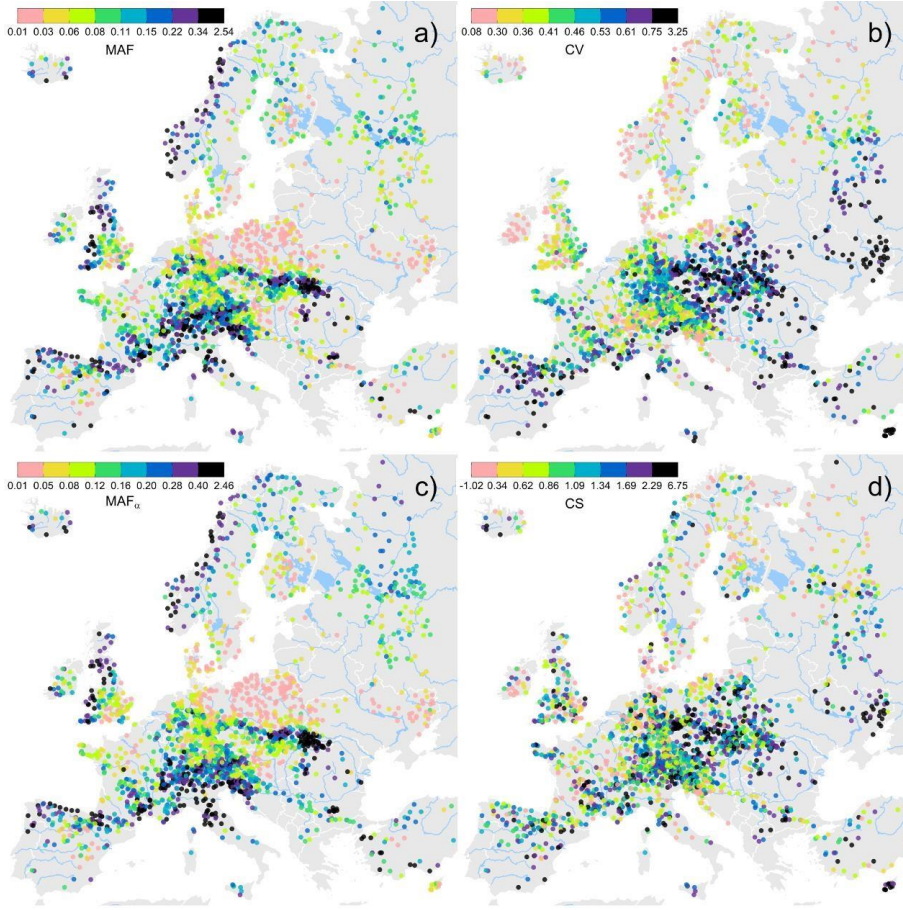

Figure 2: Mean specific flood (MAF ( $\text{m}^3 \text{s}^{-1} \text{km}^{-2}$ )) (a), Coefficient of variation (CV) (b), Mean specific flood normalised to a 250 catchment area of  $100 \text{km}^2$  (MAF<sub>a</sub> ( $\text{m}^3 \text{s}^{-1} \text{km}^{-2}$ )) (c), and Coefficient of skewness (CS) (d). Colours represent the estimate partitioned into eight classes of equal frequency.

### 3.2 Seasonality and flood moments

As an indicator of flood processes, the average direction of seasonality  $\theta$  and the strength of seasonality  $k$  are plotted in Figure 3 for each catchment (see Figure 3 in Blöschl et al., 2017, for the spatial distribution). The closer the points are to the edge of the circle, the stronger the seasonality. Additionally, the magnitudes of MAF<sub>a</sub>, CV and CS are indicated as colours as in Figure 3. The red circles in Figure 3 highlight geographic regions that are roughly homogeneous with respect to seasonality and the magnitude of the estimated flood moments, which were identified by examining seasonality maps (Blöschl et al., 2017).

260 In Northeastern Europe floods mainly occur in spring and early summer with a strong seasonality reflecting the role of snowmelt. MAF<sub>a</sub> are in a medium range (green in Fig. 3) with the exception of the Norwegian coast (circle 1) where

MAF<sub>a</sub> are much larger but with little seasonality because there is a mix of spring snow melt floods and winter rain floods (Kemter et al., 2020). The CVs of these catchments are small. On the other hand, floods in ~~Western-western~~ Russia almost always occur in April with a large CV (circle 3). The June floods further in the

265 North, adjacent to the White Sea, have much smaller CV because of a more consistent snow-melt influence (Kemter et al., 2020, circle 2).

In the northwestern part of the Atlantic region (Ireland, west coast of the UK), floods tend to occur in December and the estimates of MAF<sub>a</sub> are large (circle 4). ~~In the~~ East of the Atlantic region (Southern Germany, Czech Republic, circle 5) the average occurrence of floods is in late spring, although the seasonality is weak but CVs 270 are large.

In the Central-Eastern region (Poland, Ukraine, circle 6) where floods usually occur in spring, the MAF<sub>a</sub> are generally low and the CVs are large.

The catchments in the Alpine region with summer floods (circle 9) show high MAF<sub>a</sub> due to rainfall enhancement of the Alps. The catchments with autumn floods in Southern Austria and Slovenia (circle 7) exhibit very high 275 MAF<sub>a</sub> due to a the stronger influence of the Mediterranean Sea. ~~The This~~ region also contains the Carpathians and adjacent midlands (circle 8) where floods tend to occur in spring with lower MAF but rather high CV, likely because of a mix of snow, rain-on-snow and rainfall floods.

The Mediterranean region contains catchments with mostly winter floods with rather high MAF<sub>a</sub>. The autumn flood catchments in Slovenia have particularly high MAF<sub>a</sub> (circle 10) and low CV while the catchments with 280 spring floods on the Balkans (circle 11) possess medium MAF<sub>a</sub> and CV.

**Commented [A48]:** Is this variability mainly due to snow cover, melt timing or also rain-on-snow events?

**Commented [A49]:** Is their CV large due to interannual snowpack variability? Timing issues with spring thaws? Mixture of spring rains and snowmelt?

**Commented [A50]:** Snow or rain-driven? Or both?

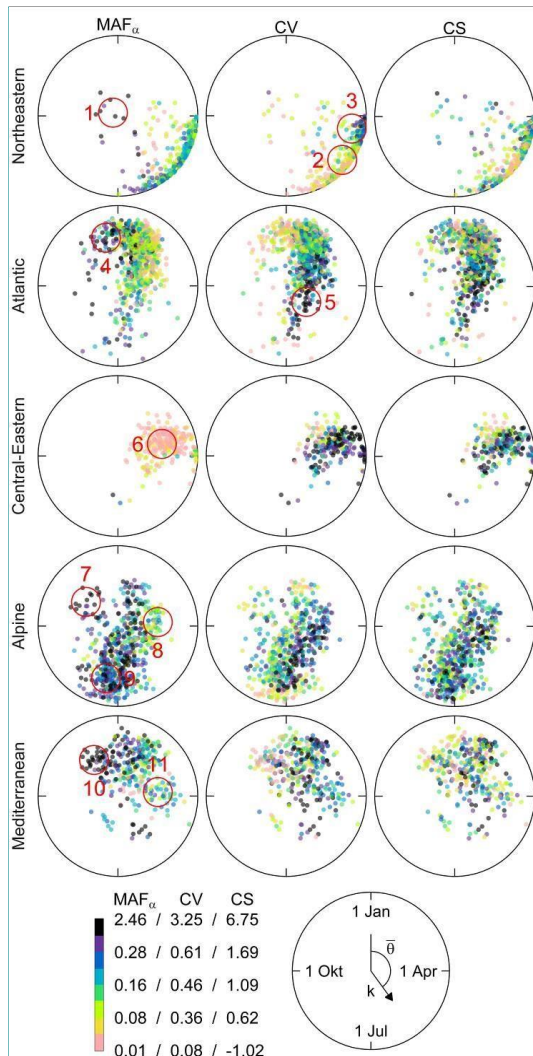

Commented [A51]: Nice figure

Figure 3: Seasonality of annual flood peaks. Position in circle indicates mean date of occurrence (angle) and variability of the date (inverse of distance from centre). Each point represents one catchment. Colours of the points indicate flood moments as 285 in Figure 2. Small red circles highlight subregions referred to in the text (1: Norwegian coast, 2: Northwestern Russia, 3: Western Russia, 4: Western UK and Southwestern Norway, 5: Southern Germany and North of Czech Republic, 6: Parts of Poland and Ukraine, 7: Southern Austria and Northern Slovenia, 8: Alpine and Carpathian midlands, 9: Alpine region, 10: Slovenia and Southern France, 11: Balkans)

Commented [A52]: I like these circled areas

### 290 3.3 Scaling of flood moments with catchment area

The first control on the flood moments examined here is catchment area, as it is often the dominant and best understood control (Table 3, Fig. 4). The highest decrease in the mean annual flood (MAF) with catchment area

occurs in the Mediterranean and the Alpine region with  $\square_{MAF} = -0.255$  and  $-0.208$ , respectively, while the weakest the smallest decreases occur in the Northeastern and Central Eastern regions ( $\square_{MAF} = -0.163$  and  $-0.108$ ) where

295 snow-melt is important. The coefficient of variation (CV) of the flood records (CV) decreases with catchment area in most regions. Again, the strongest decrease occurs in the Mediterranean while in the Northeastern and Central Eastern there is no significant relationship. There are few small catchments in the Central-Eastern region, which may make the regression with area less robust. Overall, there is a tendency for CS to decrease with catchment area and the strongest decrease occurs again in the Mediterranean.

Commented [A53]: Good obs

Commented [A54]: Could the paucity of small basins in Central-Eastern Europe contribute to the positive relation between Cs and basin area there?

Table 3: Dependence of the flood moments with catchment area in a double logarithmic relationship Eq. (5) and analogous equations for CV; and a semi logarithmic relationship for CS, i.e.  $CS = \log A \beta_{cs}$ . Last lines show the 5% and 95% quantiles of catchment area (km<sup>2</sup>). \* indicates statistical significance (two-sided t-test) at the 5% level.

|                                               | Europe   | Northeastern | Atlantic | Central-Eastern | Alpine  | Mediterranean |
|-----------------------------------------------|----------|--------------|----------|-----------------|---------|---------------|
| $\square_{MAF}$                               | -0.245*  | -0.163*      | -0.184*  | -0.108*         | -0.208* | -0.255*       |
| $\square_{CV}$                                | -0.030*  | -0.015       | -0.042*  | 0.025           | -0.020* | -0.072*       |
| $\square_{CS}$                                | -0.133*  | -0.054       | -0.124*  | 0.280*          | -0.177* | -0.232*       |
| 5% / 95% quantiles of area (km <sup>2</sup> ) | 35/11500 | 28/18010     | 37/5331  | 142/32509       | 26/4212 | 47/27251      |

305

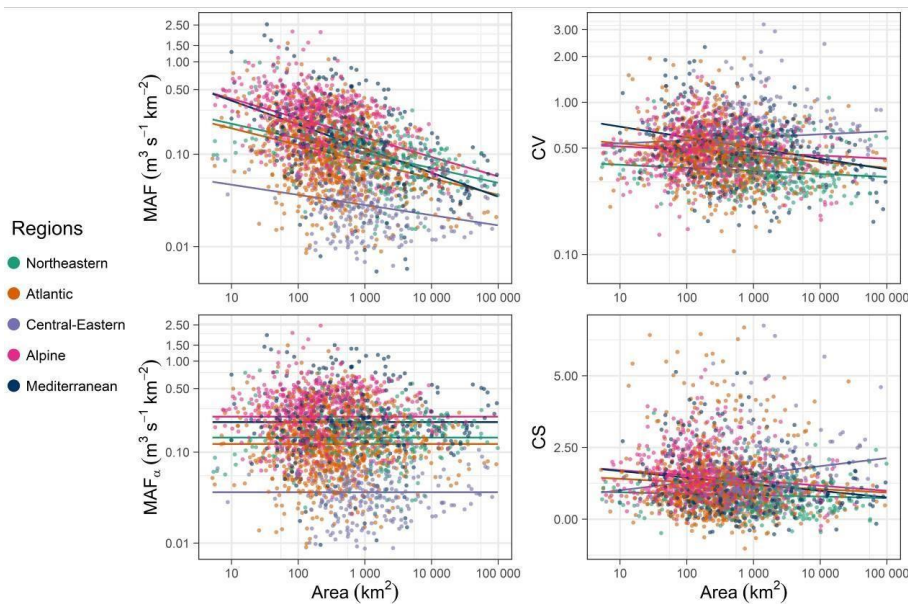

Figure 4: Mean annual specific flood (MAF), normalised mean annual specific flood (MAF<sub>n</sub>), coefficient of variation (CV) and coefficient of skewness (CS) plotted against catchment area (km²). Colours indicate region. Lines are regression lines for each of the regions.

310

3.4 Individual controls on flood moments

When interpreting the association of climate and catchment attributes with flood characteristics, it is important to account for the correlation between the attributes themselves, which may mask causal relationships. Spearman correlation coefficients have therefore been estimated among all explanatory variables (Figure 5). The largest correlations occur among the precipitation characteristics, all of which are at least  $r=0.86$ . The correlation between long-term mean precipitation (MAP) and daily precipitation not exceeded 95% of the time (P95) is even 0.96, indicating that the spatial patterns of these two variables in Europe are almost identical. The correlation between soil moisture (SM) and the precipitation variables is at least 0.78, and the correlation between the aridity index (AI) and the precipitation variables varies between -0.63 and 0.84. The latter may be partly related to the fact that AI is the ratio of potential evaporation (PET) and MAP. PET is related to spring temperature ( $r=0.73$ ). Elevation and slope are closely related to each other ( $r=0.88$ ) and they are also closely related to the precipitation variables with  $r$  of at least 0.56, reflecting orographic influences on precipitation. Forest cover (LUF) is related to elevation and slope ( $r=0.67$  and  $0.72$ , respectively) reflecting the presence of forest in mountain areas. The positive correlation between lake area fraction (LUW) and catchment area ( $r=0.45$ ) results from a tendency for large catchments to contain lowlands where lakes are more frequent than in the mountains, and the positive correlation between soil type (Stex) and spring temperature (Tspr) ( $r=0.37$ ) is due to coarse soils prevailing in the (colder) north of Europe. Fig. 5 also shows 2d histograms of the variables as well as their kernel density estimates.

Commented [A55]: 95<sup>th</sup> percentile daily precipitation

Commented [A56]: CHECK correlation between precipitation and forest cover



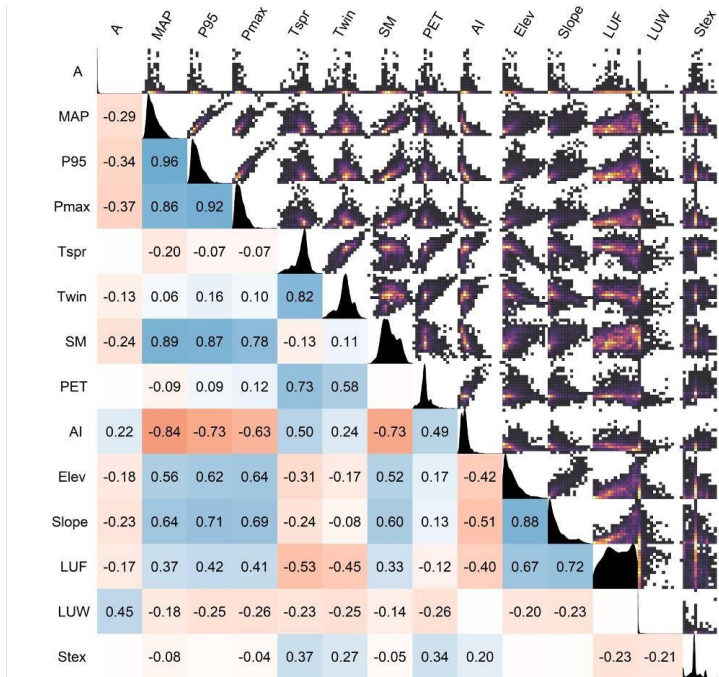

330 Figure 5: Correlation between explanatory variables as in Table 1. For each variable the data consist of  $n=2370$  values, i.e. the number of catchments. Lower triangle: Spearman correlation coefficients. They are shown if they are statistically significant ( $\alpha=0.05$ ). Blue and red indicate positive and negative relationships, respectively. Upper triangle: 2d-histograms with colours indicating the frequency of observations in the bins (dark: few; bright: many, separate scale for each panel). Diagonal: kernel density estimate. All scales are linear.

335

Figure 6 gives the Spearman correlations of the flood moments  $MAF_a$  and CV with catchment attributes. We mainly examine  $MAF_a$  instead of MAF in order to minimise the effect of spatial differences in the catchment area on the correlations with the flood moments that may mask the direct effects of other variables. The correlations for CS are often weaker and more difficult to interpret, at least partly due to estimation uncertainty.

340 The corresponding correlations for MAF and CS with catchment attributes are given in Table A.1.5 in the Appendix.

While the correlations between  $MAF_a$  and catchment area are ~~of course~~ inherently small in all regions (Table 4), the correlations between MAF and catchment area (Table A.1.5, appendix) are significant in all regions ranging between 0.31 and 0.48, with the exception of central Eastern where it is only 0.23, which may be related to the more important role of ~~snowmelt there~~. Overall, in Europe, the relative large explanatory power of catchment area points to an important role of scale effects, although, in most regions, it is not the variable with the largest-largest correlation.

345

Commented [A57]: In which region are the largest basins?

Commented [A58]: Good

Commented [A59]: Explain a bit more. How might snowmelt temper this correlation?

MAF<sub>a</sub> is significantly positively correlated with MAP in all regions (Figure 6) and ~~the its~~ correlations with P95 and Pmax are similar. These high correlations may reflect the effect of not only event rainfalls, but also soil moisture as well as landscape evolution (Perdigão and Blöschl, 2014), as all rainfall variables as well as soil moisture are highly inter-correlated

350 (Figure 5). The correlations between MAF<sub>a</sub> and precipitation (both MAP and P95) are largest in the Atlantic region, reflecting the dominant role of precipitation in explaining the spatial variability of MAF<sub>a</sub> in this part of Europe. CV is significantly negatively correlated with MAP, P95 and Pmax, for almost all regions. The strongest relationship is observed in the Alpine and Mediterranean region. In drier catchments, the occurrence of floods is more irregular (large CV, e.g. in Spain) as opposed to wetter catchments where every year rather large floods 355 occur (small CV e.g. in Norway).

One would expect the strongest correlations between flood moments and temperature in the regions with important snow-melt contributions (Northeastern, Central-Eastern regions), and this is actually the case (Figure 6). Spring (March-May) and winter (December-February) temperature are negatively correlated with MAF<sub>a</sub> and positively correlated with CV.

360 The correlations between the flood moments and mean annual maximum monthly soil moisture (SM) are very similar to those with MAP as the two covariates are correlated with  $r=0.89$ . There are high positive correlations of MAF<sub>a</sub>, in-particular especially in the Atlantic and the Mediterranean, and correspondingly but strongly negative correlations between CV and soil moisture. On the other hand, there is a small negative correlation between MAF<sub>a</sub> and the mean annual potential evapotranspiration (PET) in all regions, which can be interpreted in PET generally

365 as a higher PET generally reduces the antecedent wetness conditions of floods and hence the flood discharges.

More striking are the CVs that are strongly positively correlated with PET in most regions with  $r$  ranging between 0.1 and 0.7. Since ~~the~~ the aridity index (AI), defined as the ratio of PET and MAP, it has correlations ranging around those of PET and/or the inverse of MAP (i.e.  $-1/r$ ). The highest values of AI are observed in the Mediterranean region, where high-strong negative correlations (in absolute value) are observed for all flood moments.

**Commented [A60]:** Not sure this is necessary to report in the text.

370 Mean catchment elevation (Elev) and mean topographic slope (Slope) are highly correlated with each other ( $r=0.88$ ) and therefore have similar correlations with the flood moments in most regions. MAF<sub>a</sub> is highly positively correlated with both elevation and slope across all regions of Europe similar to just as it is with the rainfall variables, which pointings to an indirect effect of topography on mean floods through precipitation. This is consistent with high correlations of elevation and slope to the precipitation variables (around 0.6 and 0.7, respectively, Fig. 5).

375 MAF<sub>a</sub> is positively correlated with the fraction of area covered by forest (LUF) in all regions and negatively correlated with the fraction of area covered by water bodies, i.e. lakes and reservoirs, (LUW) in most regions, including in the region with the largest fraction of water bodies (the Northeastern region where the median LUW is 5.7%). The positive correlation between MAF<sub>a</sub> and LUF is most likely due to an indirect relationship, as areas with high forest cover tend to be high-elevation regions such as mountains, where precipitation is augmented 380 through orographic effects.

**Commented [A61]:** Good observation. I suggest adding a sentence saying that this should NOT suggest that deforestation reduces floods..

While there is little correlation between MAF<sub>a</sub> and soil texture, there is a clear effect of soil texture on CV with finer soils (Stex=5) being associated with higher CVs than coarse soils (Stex=1).

**Commented [A62]:** Explain this in terms of infiltration being greater in coarser soils, which tend to be more permeable

|       | Europe           |       | Northeastern     |       | Atlantic         |       | Central – Eastern |       | Alpine           |       | Mediterranean    |       |
|-------|------------------|-------|------------------|-------|------------------|-------|-------------------|-------|------------------|-------|------------------|-------|
|       | MAF <sub>α</sub> | CV    | MAF <sub>α</sub> | CV    | MAF <sub>α</sub> | CV    | MAF <sub>α</sub>  | CV    | MAF <sub>α</sub> | CV    | MAF <sub>α</sub> | CV    |
| A     | -0.12            | -0.13 |                  | -0.16 |                  | -0.19 |                   |       |                  |       |                  | -0.25 |
| MAP   | 0.59             | -0.33 | 0.15             | -0.23 | 0.67             | -0.33 | 0.24              | -0.49 | 0.26             | -0.61 | 0.48             | -0.68 |
| P95   | 0.60             | -0.22 |                  |       | 0.66             | -0.22 | 0.31              | -0.19 | 0.24             | -0.58 | 0.52             | -0.59 |
| Pmax  | 0.55             | -0.05 |                  |       | 0.52             | 0.14  | 0.22              | -0.18 | 0.26             | -0.40 | 0.49             | -0.36 |
| TSpr  | -0.22            | 0.26  | -0.35            | 0.58  | -0.29            |       |                   | 0.50  | -0.14            | 0.38  | -0.12            | 0.17  |
| TWin  | -0.07            | 0.04  | -0.20            | 0.20  |                  | -0.23 | -0.33             | -0.52 | -0.10            | 0.10  |                  | 0.27  |
| SM    | 0.57             | -0.31 | 0.16             | -0.14 | 0.55             | -0.29 | 0.28              | -0.40 | 0.22             | -0.56 | 0.50             | -0.64 |
| PET   |                  | 0.39  | -0.33            | 0.60  | -0.22            | 0.34  |                   | 0.68  | -0.11            | 0.11  | -0.21            | 0.63  |
| AI    | -0.53            | 0.46  | -0.36            | 0.62  | -0.53            | 0.38  |                   | 0.63  | -0.31            | 0.50  | -0.43            | 0.69  |
| Elev  | 0.55             | 0.08  | 0.47             | -0.31 | 0.44             | 0.35  | 0.50              | 0.21  | 0.16             | -0.47 |                  | 0.20  |
| Slope | 0.65             |       | 0.39             | -0.36 | 0.62             | 0.17  | 0.30              |       | 0.24             | -0.40 | 0.37             |       |
| LUF   | 0.45             | -0.10 | 0.28             |       | 0.45             | 0.14  |                   | -0.39 | 0.16             | -0.26 | 0.32             |       |
| LUW   | -0.16            | -0.27 | -0.21            | -0.22 |                  | -0.20 | -0.55             | -0.50 |                  | -0.19 |                  | -0.19 |
| Stex  | -0.06            | 0.29  |                  | 0.37  |                  | 0.17  | 0.32              | 0.53  |                  | 0.23  | -0.18            | 0.26  |

**Commented [A63]:** Is it worth going to into so much detail about the bivariate correlations when there are so many confounding factors, as you seem to recognize?

385 Figure 6: Spearman-Correlation between statistical moments of flood series (mean specific discharge normalized to a catchment area MAF<sub>α</sub> of α=100km<sup>2</sup> and the coefficient of variation CV) and catchment attributes. Correlations are shown if they are statistically significant (α=0.05). Blue and red indicate positive and negative relationships, respectively. The correlations for mean specific discharge MAF and coefficient of skewness CS with catchment attributes are given in Table A.1.5.

**Commented [A64]:** Suggest adding dark vertical lines to separate each region's results if possible

390

### 3.5 Multiple controls on the flood moments

While Figure 6 examines the relationships between flood moments and single covariates using Spearman correlation coefficients, in this section we test the relationship between flood moments and multiple covariates

395 with regression models applied for each of the regions separately. Thus, the covariates with the largest contributions are those that explain most of the  $R^2$  of the spatial variability of the flood moments within each of the regions. We used MAF, rather than  $MAF_{\text{a}}$ , in order to avoid prior assumptions regarding the role of catchment area. Given that CS was correlated with fewer covariates than the other flood moments, we focused here on MAF and CV (Table A.1.5). We represent each of four most important groups of covariates (area,

400 precipitation, temperatures and water balance) by one covariate. The contributions to explaining the spatial variability of MAF in terms of the normalised general dominance measure (nGDM) are shown in Figure 7 and Table A.1.3 and are discussed below by region.

In Northeastern Europe, like in all regions, catchment area is an important predictor of MAF. Additionally, P95 and AI play an important role representing an East-West gradient with the largest MAF, largest P95 and the 405 lowest AI in Norway.

In the Atlantic region, P95 is by far the most relevant covariate (nGDM= 0.8) as one would expect in a region where floods are rainfall driven and soil moisture tends to be high in the flood season (winter) (Blöschl, Hall et al., 2019 ; Kemter et al., 2020).

In the Central-Eastern region MAF is generally low with little spatial variability. The corresponding  $R^2$  is small 410 (Table A.1.1), as it is harder to explain the small spatial contrast. The largest contribution is winter temperature and P95. Negative coefficients for winter temperature ~~point to suggest that~~ lower temperatures ~~produced driving~~ deeper snow-packs and, in turn, higher floods.

In the Alpine region, area is most important and in fact relatively more important than in any other region. However, the  $R^2$  of the model in the Alpine region is low.

415 In the Mediterranean catchment area is important (NGDM= 0.43), which is due to the small coastal catchments exhibiting much larger specific floods than the larger catchments that extend further ~~into the in-~~land, e.g. in Catalonia (Spain), Liguria (Italy), and Slovenia (e.g. Gaume et al., 2009). Additionally, P95 plays a relevant role.

**Commented [A65]:** Not normalized by area at all?

**Commented [A66]:** Is it worth including so much about Cs then?

**Commented [A67]:** What is the water balance group? Look at interaction effects?

**Commented [A68]:** Perhaps a proxy variable for snowmelt-driven floods is needed there

Also, do smaller headwater basins in the Alpine region have more snow cover and, if so, do they generate larger floods than larger ones with less snow cover?

**Commented [A69]:** Good interpretation

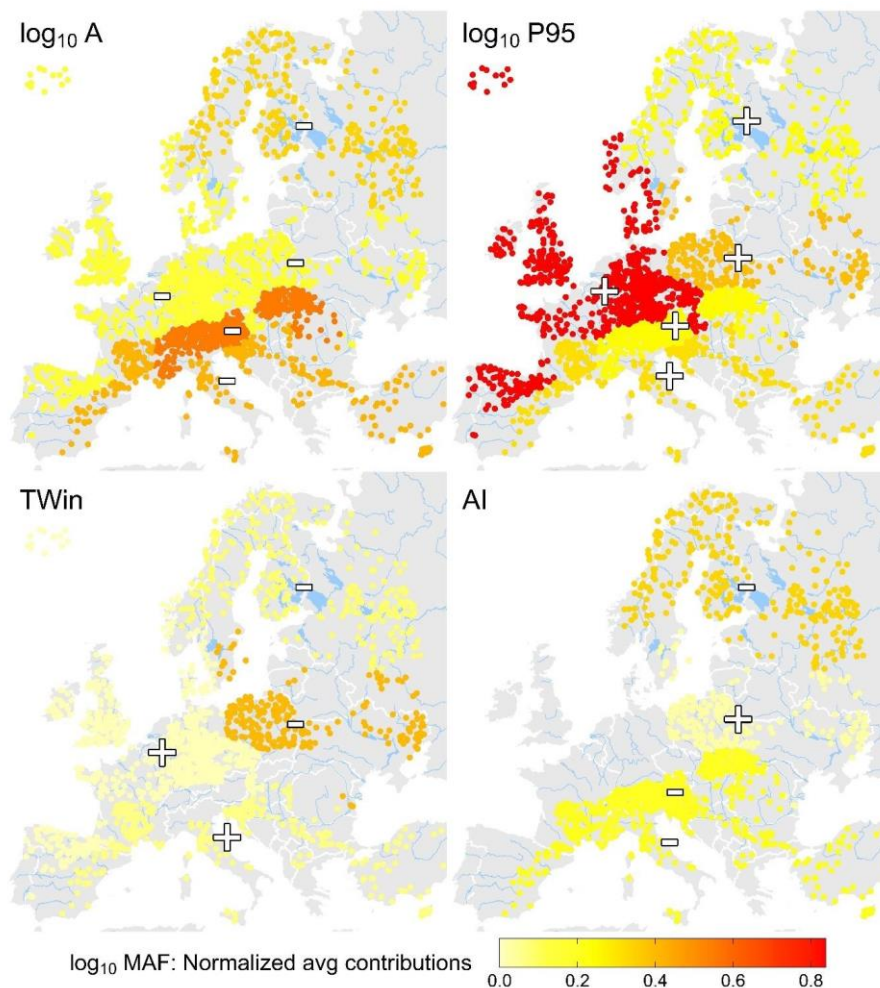

Figure 7: Results of dominance analysis for regional regression models for MAF. Panels depict the average contributions (normalised general dominance measure, nGDM) of the covariates included in the regressions (log of catchment area, log of extreme precipitation index P95, mean winter temperature and aridity index). Plus- and Minus-signs indicate sign of the regression coefficients.

For CV (Figure 8, Table A.1.4), in the Northeastern region the Aridity index (AI) is the most important covariate by far. This is due to Scandinavia being much wetter than ~~Northwestern-northwestern~~ Russia translating into lower CVs.

In the Atlantic region AI is the most important variable for explaining the spatial variability of CV although the overall explanatory power of the regional model is rather low ( $R^2$  of 0.27, Table A.1.2). The smaller CV closer to the ocean in the Atlantic region is partly explained by higher winter temperatures.

**Commented [A70]:** Please put all regional  $R^2$  in parentheses as you describe them in the text. Also, it might help to put this table in the main text.

Check for other instances of this throughout the manuscript.

**Commented [A71]:** Please tell readers how higher winter temperatures lead to lower CV's here.



In the Central-Eastern region AI dominates again with higher CV in the Ukraine correlated with higher aridity 430 than further in the West, both due to higher PET and lower MAP.

The Alpine region is an exception in that P95 explains more of the spatial variability of CV than AI (nGDM of 0.54 and 0.35, respectively). This is because PET is negatively related to elevation but the flood magnitudes are controlled by the higher orographic rainfall on the windward (NW) side of the Alps.

In the Mediterranean both aridity and P95 are important predictors. For example, low aridity (because of high 435 MAP) in Croatia and Slovenia is associated with low CV, and high P95 in Southern France is associated with moderately low CV.

Commented [A72]: Good analysis

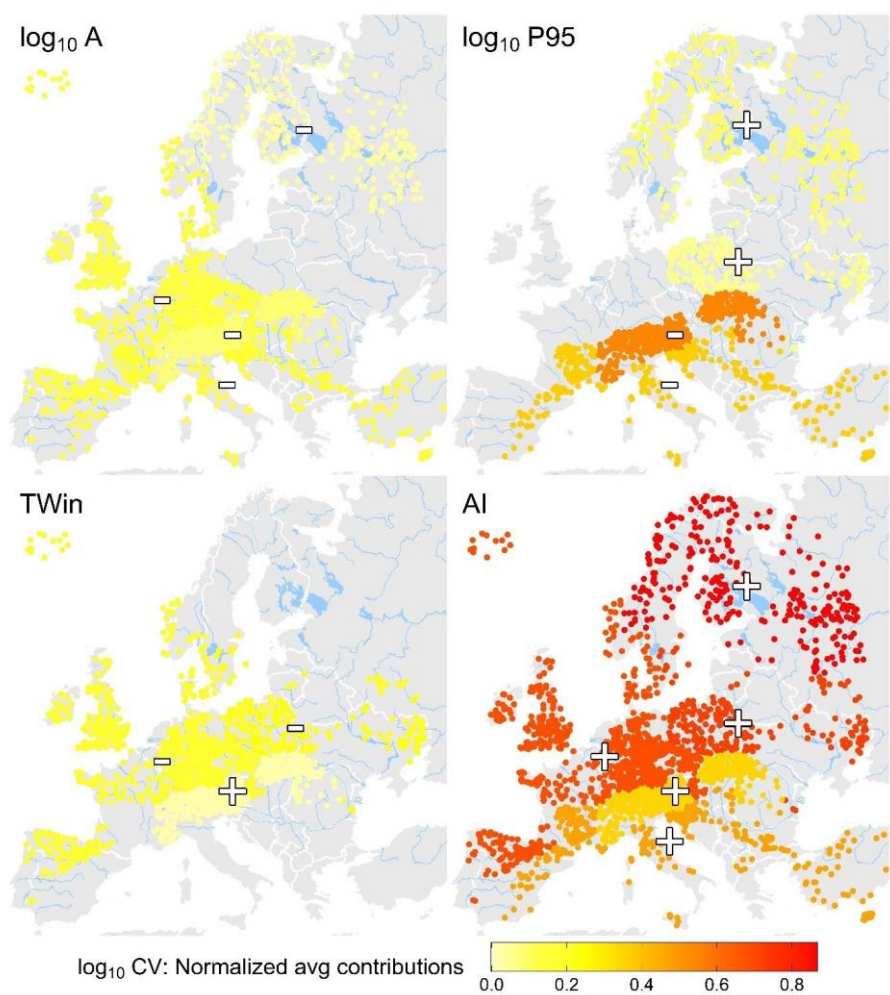

Figure 8: Results of dominance analysis for regional regression models for CV. Panels depict the average contributions

(normalised general dominance measure, nGDM) of the covariates included in the regressions (log of catchment area, log of extreme precipitation index P95, mean winter temperature and aridity index). Plus- and Minus-signs indicate sign of the regression coefficients.

3.6 Estimating flood moments from multiple controls

In this section we analyse how well the regression models of the previous section (where A, P95, TWIn and AI were used as covariates) are able to predict the moments at any location in terms of using a leave-one-out-cross-validation (Figures 9 and 10). Overall, there is a tendency for MAF to be overestimated in those areas where the observed values of MAF are small (e.g. Hungary and Denmark), and underestimated where they are large (e.g. Carpathians, Northern Italy) reflecting the property-tendency of spatial estimators to underestimate spatial extremes. The overestimation in Finland may also be due to lake retention not being captured adequately in the model. To some degree CV is also overestimated in areas of low CV (e.g. southern Norway and Denmark) and underestimated in areas of high CV (e.g. Ukraine, Ore mountains) although there are also large CV areas it is overestimated (e.g. Southern Spain). The errors are smallest in Russia, Central Germany, British Island-Isles and France where the spatial gradients in CV are relatively smooth.

The median absolute normalized error of MAF and CV is 0.37 and 0.18, respectively, with 25%-quantiles of 0.17 and 0.09 and 75%-quantiles of 0.63 and 0.32. This means that the absolute normalized error of CV is about half that of MAF, which seems to be related to the relatively smaller spatial variability of CV as compared to MAF (spatial cvs of 1.11 and 0.49, respectively, Table 2).

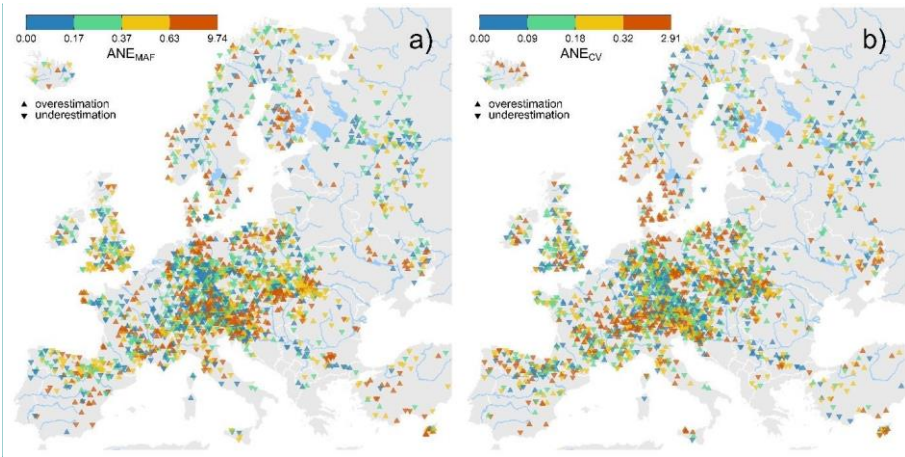

Figure 9: Absolute normalised errors  $ANEMAF$  and  $ANECV$  of the predictions of the regional regression models for MAF and CV. Errors are evaluated on scale of data (not logarithmised). Colours refer to binned classes of equal frequency. Triangles facing upwards indicate gauges where the model overestimates the moments, triangles facing downwards where the model underestimates.

Figure 10 depicts the predicted (leave-one-out) MAF and CV using the regressions (Circles in Figure 10, Tables

Commented [A73]: If insignificant no sign shown? Please clarify this.

Commented [A74]: This suggests that you have heteroscedastic residuals, and that you haven't explained an important component of the variance in your data.

Commented [A75]: You mean LUW was not considered here...not any sort of man-made regulation

Commented [A76]: British Isles (Great Britain + Ireland)? Or the island of Great Britain?

Commented [A77]: Throughout Europe?

Commented [A78]: Consider using a trichromatic legend where one color gets stronger as the errors become more negative, a neutral color indicates where errors are low, and a third color becomes stronger as error get positive.



A.1.1 and A.1.2) and the predicted MAF and CV by spatial proximity through kriging of the observed moments 465 (background colour). Predictions are shown on the scale of the data (not logarihised) using the colour scale from figure 2. Notwithstanding the relatively large ANE (Fig. 9), the overall patterns of the moments are very similar to the observed ones (Figure 2). Notice that the regression models are not applied for all available sites because some of the local peculiarities (that may have physical reasons) are missed. Overall, the patterns of the moments are consistent with the process reasoning put forward in this paper.

Commented [A79]: List these in SI. I assume these were left out of the kriging analysis as well.

470

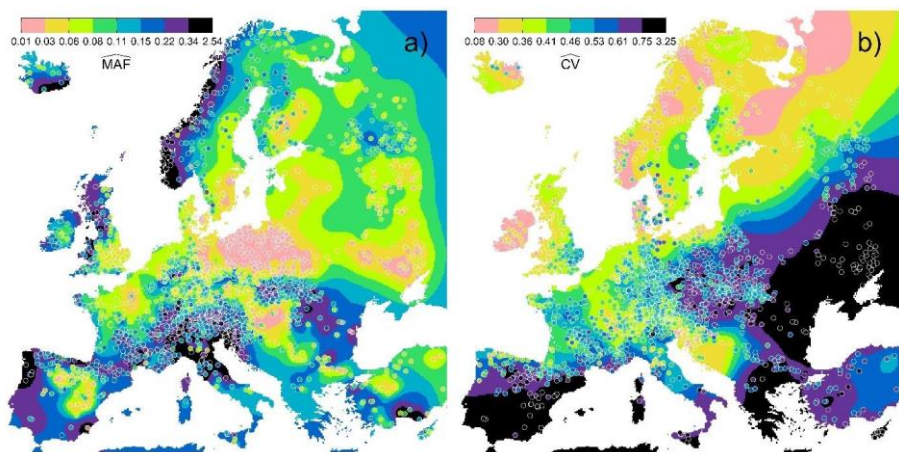

Figure 10: Predicted values of regional regression models and ordinary kriging for MAF ( $\text{m}^3 \text{s}^{-1} \text{km}^{-2}$ ) and CV. Circles refer to predictions of regression models, background refers to predictions of kriging. Colours refer to binned classes of equal frequency for original data (estimated statistical moments) as in Figure 2.

475

#### 4. Discussion and Conclusions

##### 4.1 Patterns of flood moments in Europe

Overall, there are clear patterns of the flood moments across Europe. As ~~would-be~~ expected, MAF shows the clearest patterns while they are less clear for CV and particularly CS, at least partly because of sampling 480 variability.

In the Atlantic region, where floods mainly occur in winter as a result of moisture influx from the ocean,  $\text{MAF}_a$  is very high (above  $0.5 \text{ m}^3/\text{s}/\text{km}^2$  ~~at the West~~ along the western coasts of Norway, Scotland and Galicia, Fig. 2). The CVs, on the other hand, are small (typically around 0.3 at the Norwegian coast and in Scotland and 0.5 in Galicia) as the atmospheric moisture influx tends to be consistent between years (Giorgi et al., 2004). As one moves towards the

485 continent from the west coast of the British Isles, ~~the~~ MAF tends to decrease and ~~the~~ CV increases because of the decreasing moisture availability and floods tend to occur later in the ~~yea~~winter (i.e. Jan instead of Dec., Fig. 3).

Further inland, the various mountain ranges (Pyrenees, Massif Central, Alps Apennines, Ore mountains, Carpathians, Balkan mountains) stand out with higher MAF than the surrounding ~~areas~~ (mostly above 0.3

m<sup>3</sup>/s/km<sup>2</sup>) and summer as the dominant flood season due to their effects of enhancing rainfall and probably shallower soils.

490 On the other hand, there are clear differences between the CVs of these mountain ranges. While CVs in the Alps and the southern Slovenian mountains are low, they are high in the Ore mountains and some of the other mountain ranges which reflects the stronger influence of Mediterranean storm tracks (Hofstätter et al., 2018, Hofstätter and Blöschl, 2019) perhaps along with non-linear runoff generation (Viglione et al., 2009).

Commented [A80]: Are these storm tracks more regular?

As one moves inland in the North of northern Europe from the Norwegian coasts towards the North European plain, MAF

495 decreases to values around  $MAF_a = 0.1 \text{ m}^3/\text{s}/\text{km}^2$  due to a decrease in the Atlantic influence and increase of snow processes resulting in late spring events with pronounced seasonality. As one moves southward from the Northeast, CV increases and flood seasonality decreases in line with the increased influence of rain-on-snow and rain floods, which tend to be more irregular than snowmelt floods alone.

Some of the continental regions of Europe (Hungary, Poland, Ukraine) are particularly sheltered by mountain 500 chains, resulting in low precipitation, both at the annual scale and for extreme events which translates into low MAF and mostly high CV.

Commented [A81]: Explain a bit more

In the Mediterranean, where floods tend to occur in autumn and winter, MAF is generally high, particularly in Southern France, Slovenia and Croatia, Liguria (NW Italy), and parts of northern Italy, as a result of the potential of due to heavy autumn storms due to stemming from the warm Sea surface temperatures. In most regions this also results in a high CV, although this is not the case in Slovenia 505 and Croatia, due to the consistency of these storms between years (Xoplaki et al., 2004, Salinas et al., 2014b).

#### 4.2 Interpretation of controls of flood moments

The degree to which the moments change with catchment area is a fingerprint of the spatial variability of the flood producing processes (Merz et al., 2003, Sivapalan et al., 2005, Merz and Blöschl, 2009, Viglione et al., 2010ab) (Table 3, Figure 4). As expected, there is a strong scaling effect of MAF with area. The strongest

510 decrease of MAF with area is observed for the Mediterranean region, which points to the important role of small scale, convective storms, patchy runoff generation processes, and more generally flash floods there (Gaume et al., 2009; Marchi et al., 2010; Amponsah et al., 2018). On the other hand, the smallest decrease is found in the Central-Eastern and Northeastern region, where snowmelt is a dominant flood driver. Snowmelt tends to occur over larger regions simultaneously, which results in a smaller reduction of MAF with catchment scale. This is

515 consistent with Blöschl and Sivapalan et al. (1997) and Merz and Blöschl (2003). The relatively weak decrease in the Atlantic regions suggests an important role of large-scale precipitation as would be expected (Kemter et al., 2020).

Commented [A82]: Good commentary about consistency with other studies

Commented [A83]: From large frontal systems?

CV decreases with area in most of the regions. Again, the strongest decrease is observed for the Mediterranean region, which can be interpreted in terms of similar aggregation processes as in the case of MAF. Additionally,

520 the degree of non-linearity in runoff generation may decrease with catchment size (Sivapalan, 2003) as threshold processes associated with Hortonian runoff generation or soil storage homogeneity may be more relevant in small

catchments (Penna et al., 2011; Rogger et al. 2012). On the other hand, the smallest decrease occurs in the Northeastern region and in the Central Eastern region, where the estimated regression coefficient is even positive. While both relationships are not significant, they do point towards the larger scale of snowmelt processes relative to

**Commented [A84]:** Will the thresholds vary more in larger basins due to their greater environmental heterogeneity? Also, consider spatiotemporal aggregation effects.

525 other flood generation processes along with more linear runoff generation processes and the larger role of baseflow there (Blöschl and Sivapalan, 1997).

The strongest Spearman correlation for MAF (in absolute value) is observed for the Mediterranean region, while the weakest is observed in the Central-Eastern region (Table A.1.5), in line with the difference in the scale dependence between these two regions (Table 3). For CV (Figure 6) the spatial differences of the correlations

530 between the regions are also consistent with the scaling regressions of Table 3 but, overall, they are smaller than those of MAF. This may be related to possible non-monotonous relationships between CV and area as suggested by Smith (1992), and more complex aggregation effects (Blöschl and Sivapalan 1997). The weakest relationships are is found in Central-Central-Eastern Europe where snow is important, and in the Alpine region where the spatial variability of other controls is particularly large ( $r=0.09$  and  $-0.03$ , respectively).

**Commented [A85]:** Can you show a figure of this in your regions?

535 As compared to the other controls on the flood moments, area plays an important role for MAF but less so for CV (Table A.1.5, Figures 7 and 8). In the Alpine region the Spearman correlations between MAF and area are larger than those between area and other covariates (Table A.1.5) and it has the large contributions to the fit of the regional model (Figure 7). However, this may not be because of the high explanatory power of area but of the lower explanatory power of the other covariates likely related to the complex topography. For CV, area has 540 some explanatory power in the Atlantic and Mediterranean regions (Figure 6) and is used in most regional regression models, but the role of climate variables such as precipitation and aridity is always much higher than that of area (Figure 6, Figure 8) suggesting that aggregation effects are relatively less important at the European scale than at the regional scale.

**Commented [A86]:** Because more of the between-region variability is explained by hydroclimatic differences, which makes sense given that the regions are intended to represent distinct hydroclimatic zones in Europe

Precipitation characteristics are represented by three variables in the present study, which are strongly correlated 545 among themselves (Figure 5). The Spearman correlations between MAF and the precipitation characteristics are positive for Europe and in individual regions while for CV and precipitation they are negative (Figure 6) but there are some differences between the precipitation variables. MAP is a surrogate for event precipitation, antecedent soil moisture and landscape evolution, whereas P95 and Pmax are more representative of characteristics of event precipitation. Pmax is representative of a more extreme part of the daily precipitation

**Commented [A87]:** What exactly do you mean by landscape evolution?

550 distribution than P95 (typically Pmax is twice the value of P95, Table 1). The correlations of MAP and P95 with MAF<sub>a</sub> are similar, but generally larger than that of Pmax which may be due to Pmax capturing antecedent soil moisture less. Mimikou and Gordios (1989) and Merz and Blöschl (2009) concluded that MAP was somewhat superior to other precipitation variables in explaining the spatial MAF variability in Greece and Austria, but at the European scale the predictive power of MAP and P95 are similar, and that of Pmax is slightly lower.

**Commented [A88]:** This paragraph is comprehensive but a bit too long and reads like a lab report.

555 CV is always a better correlated with MAP than with P95 and Pmax<sub>1</sub> reflecting the decreasing degree with which antecedent soil moisture is captured as one moves from MAP to P95 and Pmax. Drier catchments have the ability

can produce larger CVs because some of the events may be a combination of both large precipitation and wet initial conditions such producing much larger floods than usual (Farquharson et al., 1992, Viglione et al., 2009; Kemter et al., 2020). This effect is also represented in the negative correlations between CS and MAP ( $r = -0.35$ ) and CS and P95 ( $r = -0.34$ ) (Table A.1.5) in the Mediterranean which is related to a particularly large potential for this contrast in initial conditions.

**Commented [A89]:** Because the antecedent soil moisture conditions tend to vary more than they do in human catchments?

In the context of multiple controls, rainfall (in this case only P95 was considered) is always among the important variables for explaining MAF (Figure 7). However, in the case of CV, aridity is vastly more important, as the combination of evaporation and precipitation better captures the typical initial condition state of the catchments before floods.

Mean spring and winter temperature were used in the analysis to capture snow processes. As would be expected, the Spearman correlations between temperature and  $MAF_a$  and CV are comparatively high in the Northeastern and Central-Eastern region, where snow-processes are important for floods. Temperatures are negatively correlated with  $MAF_a$  and positively correlated with CV. The colder it is, the more precipitation is stored as snowpack in winter, leading to, on average bigger snowmelt floods in spring/early summer, but they are less variable (smaller CV) which may be related to the smaller interannual variability of air temperature as compared to that of precipitation (Giorgi et al. 2004). Snowmelt floods are physically limited by the amount of water stored as snow and solar radiation. This upper limit also contributes to less extreme and more regular floods (Merz and Blöschl, 2003). In these cold regions temperatures are better correlated with  $MAF_a$  and CV than with the precipitation variables and almost as well as with aridity, although this depends on the moment and the region.

Winter temperatures add explanatory power to the regional regression models of MAF in the Central-Eastern region, but a rather small contribution for the other regions (Figure 7). For CV, temperatures explain some of the spatial variability in the Central-Eastern and the Atlantic region, but generally its contribution is low (Figure 8).

On the one hand, winter temperature may not be a perfect proxy for the spatial distribution of flood-relevant snowmelt. On the other hand, the other variables may more directly capture runoff generation processes.

Soil moisture, PET and the aridity index (AI) are related to long-term water balance characteristics and are significantly correlated with the estimated flood moments for almost all regions. Soil moisture is positively correlated with  $MAF_a$  and negatively correlated with CV, whereas the opposite holds for PET and AI. Soil moisture and MAP are highly correlated, which is related to soil moisture being driven by long term

precipitation. The lower the wetness state, the more room for variations in the runoff coefficients between years, and therefore flood peaks and thus high CV (Viglione et al., 2009). For PET and AI the highest correlations with  $MAF_a$  are observed in the Northeastern, the Atlantic and the Mediterranean region. AI is strongly correlated with CV (Figure 6) and a particularly important variable for capturing the spatial variability of CV in regional regression models (Figure 8). High aridity implies a combination of low precipitation and high evaporation,

leading to comparatively dry antecedent conditions. AI may also capture the non-linearity of runoff-generating mechanisms relevant for CV (Blöschl and Sivapalan, 1997). Additionally, precipitation tends to be more variable in the arid regions of Europe (e.g. Giorgi et al., 2004), so there may be both a precipitation and runoff generation effect, the latter being related to the stronger randomness of the runoff coefficient. The effect of the large variability of runoff coefficients between years in the arid catchments of Europe (large AI) is also apparent in the

595 positive correlations with CS in the Mediterranean and Central-Eastern region ( $r=0.35$  and  $0.50$ , respectively) (Table A.1.5)

Topography is included via slope and elevation in the present analysis, but the observed effects of topography on the flood moments are most likely indirect. Precipitation characteristics are highly correlated with topographical indices (Figure 5) and their spatial patterns are very similar (not shown), suggesting little unique effect. Faster  
600 routing (flow velocity) due to topography does not seem to be a relevant factor for the spatial patterns of flood moments at the European scale, given that response times may be more closely related to geology than topography at the regional scale (Gaál et al., 2012).

The fraction of area covered by forest (LUF) is positively correlated with  $MAF_a$  which is not consistent with the usual expectation of higher infiltration capacities and therefore smaller floods peaks for forest soils (Sun et al.,  
605 2018). At the European scale, apparently, this effect is masked by the correlations between forest cover and precipitation. In high elevation regions of Europe forest cover tends to be high as these areas have not been deforested for agricultural purposes, and these are also the areas of high rainfall because of topographic effects on rainfall. Additionally, runoff coefficients may be higher in these high rainfall areas due to shallower soils and water tables notwithstanding the forest cover (Merz et al., 2006, Rogger et al., 2017).

610 The fraction of area covered by water bodies reduces both  $MAF_a$  and CV. The former is consistent with retention effects while the relationship between CV and water body size may be non-linear (increasing CV up to a water body threshold and decreasing CV beyond, Wang et al., 2017) which is not captured by Spearman correlation.

Soil texture, when interpreted in terms of pedotransfer functions (Picciafuoco et al., 2019), is expected to affect  
615 infiltration of event rainfall. Coarse soils ( $Stex=1$ ) are therefore expected to be associated with smaller  $MAF_a$  than fine soils ( $Stex=5$ ) but the data show no consistent relationship. In a similar vein, the data suggest that coarse soils tend to be associated with small CV, which contrasts what one would expect by reasoning in terms of runoff generation processes. For coarse soils one would expect that, for small events, most of the water infiltrates but when a threshold is exceeded the rainfall starts to run off from the surface, thus leading to larger

620 CV relative to soils without threshold behaviour (Rogger et al., 2013). One reason for observing the opposite are the correlations between MAP and  $Stex$  within the regions which range between  $-0.08$  and  $-0.36$ , i.e., coarse soils would be associated with high precipitation which would explain large MAF and small CV. Apparently at the scale of an entire continent, the soil characteristics (at least the texture available here) are less important than climate variables. The rather low explanatory power of soil texture and land use for hydrological response at the  
625 regional scale is a general concern that also affects the estimation of other variables in the context of predictions in ungauged basins (Blöschl et al., 2003).

#### 4.3 Implications

Even though the main objective of this paper is to investigate why spatial patterns of flood moments occur, the results in Section 3.6 may be considered as a benchmark for flood moment estimation in ungauged basins at the  
630 European scale. The median absolute normalized error (ANE) of MAF and CV is  $0.37$  and  $0.18$ , respectively. This is relatively large as compared to similar, but smaller scale, studies in the literature (Merz and Blöschl, 2009; Viglione

Commented [A90]: Good pt

Commented [A91]: Show this?

Commented [A92]: Nice analysis.

et al., 2013). The fit of the regional models changes between the regions, which reflects the relative importance of the flood generating processes changes between the regions. For the case of MAF,  $R^2$  is largest in the Atlantic and Mediterranean regions (Table A.1.1) and for CV it is largest in Eastern and

**Commented [A93]:** What values did they obtain? For which regions?

635 Mediterranean regions. Clearly there is no ~~one-fits-all model~~ applicable to all regions of Europe. The regions here were derived based on previous climatic partitions of Europe and the goal of homogeneity with respect to flood generating processes and geographic coherence, rather than optimal predictive performance of the regional models.

**Commented [A94]:** Change term

Overall, the findings of this paper suggest that, at the continental scale, climate variables dominate over land surface characteristics as control of the spatial patterns of flood moments. Given the evidence for the

**Commented [A95]:** If I understood you correctly, didn't you say earlier that these regions reflected general hydroclimatic properties rather than flood-generating processes in particular?

640 coevolution of landscape and climate (Perdigao and Blöschl, 2014, Troch et al., 2015) but the general lack of predictive power of variables related to land use, soil and geology for hydrological quantities (Merz and Blöschl, 2009, Rogger et al., 2017), there is a need for new types of land characteristics, that are consistent across countries. Merz and Blöschl (2009) illustrate this notion by a comparison of two Austrian catchments that have strikingly similar geological characteristics in terms of percentage of area of certain geological types, but vastly

**Commented [A96]:** Mention this earlier

**Commented [A97]:** Is it worth mentioning that the lack of importance of land-surface characteristics in explaining the spatial variability of floods over large regions of Europe should not be construed to mean that land-surface perturbations have a second-order effect at individual sites compared to climate?

645 different rainfall-runoff response-behaviour. At the plot, hillslope and catchment scales, runoff generation is strongly controlled by soil properties, including their which control infiltration and saturation capacities (Peschke and Sambale, 1999; Scherrer et al., 2007; Rogger et al., 2012; Picciafuoco et al., 2019). There have been attempts to relate or upscale local soil characteristics and regional ones (e.g., Schmocker-Fackel et al., 2007). One successful example is the HOST classification used in the UK (Boorman et al., 1995; Lilly et al., 1998; Maréchal and

650 Holman, 2005), which has been demonstrated to be able to capture runoff generation processes and their spatial variability. Of course, scaling becomes important as well and land-use may have larger explanatory power in small catchments than in larger ones (Viglione et al., 2016).

The finding that climate is the main control for the spatial variability of the flood moments, within the range of the variables considered, also has some implications for quantifying the temporal flood variability. If the spatial

655 patterns of flood behaviour at the continental scale are primarily driven by climatic influences, their temporal fluctuations might be propagated to floods (Šraj et al., 2016, Blöschl, Hall et al., 2019, Bertola et al., 2020, Kemter et al., 2020) On the other hand: flood changes of small local streams may be much more controlled by land use change such as urban development and deforestation (Rogger et al., 2017). One should however be careful in trading space for time in the context of change, i.e. in assuming that future flood characteristics in one

660 region will be similar to the present ones in another region because the climate in the former will be similar to the present climate in the latter. This is because of the space-time asymmetry discussed in Perdigao and Blöschl (2014), i.e. the fact that, because of the celerity of coevolution, spatial and temporal statistics are not necessarily the same.

**Commented [A98]:** Can you describe this in simpler language a bit so a wider range of readers who are not familiar with Perdigao and Blöschl can understand this?

Hydrology of flood frequency Flood-frequency analysis is challenging because it deals with the extreme limit of the natural variability of

**Commented [A99]:** Good pt...expand on it a bit more

665 river flows. This paper is a step toward a better process-based understanding of the hydrology of flood frequency the statistical properties of annual floods in Europe, along with studies that combine process hydrology, comparative hydrology and paleohydrology, including learning the recent past history of floods (Merz and Blöschl, 2008ab, Viglione et al., 2013, Blöschl et al., 2020). We believe that linking the hydrology of flood frequency to models of

coevolutionary indices of climate and landscape has the potential to reveal a lot about all aspects of catchment hydrology, ultimately leading to better predictions.

670

675

**Commented [A100]:** Can you give an example of such a coevolutionary index earlier on?

I would add a few more of your key accomplishments in this paper to the last paragraph as well as a sentence or two regarding more general future directions, and not a specific focus on coevolution. See ideas about nonstationarity and mixed distributions.



5. Appendix

Table A.1 Regression coefficients (standard errors), model error variance and R<sup>2</sup> of regional regression models for MAF

| Log <sub>10</sub> MAF | (Intercept) | Log <sub>10</sub> A | Log <sub>10</sub> P95 | TWin        | AI          | sigma | R <sup>2</sup> |
|-----------------------|-------------|---------------------|-----------------------|-------------|-------------|-------|----------------|
| Europe                | -2.18(0.09) | -0.16(0.01)         | 1.61(0.07)            | -0.02(0.00) | -0.04(0.02) | 0.31  | 0.47           |
| Northeastern          | -1.76(0.42) | -0.14(0.02)         | 1.22(0.31)            | -0.05(0.01) | -0.33(0.08) | 0.24  | 0.41           |
| Atlantic              | -3.31(0.11) | -0.13(0.01)         | 2.54(0.09)            | 0.01(0.00)  |             | 0.26  | 0.51           |
| Central-Eastern       | -4.54(0.62) | -0.09(0.03)         | 3.33(0.59)            | -0.07(0.01) | 0.10(0.07)  | 0.25  | 0.33           |
| Alpine                | -0.68(0.21) | -0.18(0.02)         | 0.47(0.14)            |             | -0.16(0.06) | 0.27  | 0.27           |
| Mediterranean         | -1.09(0.26) | -0.22(0.02)         | 0.94(0.19)            | 0.02(0.01)  | -0.16(0.04) | 0.32  | 0.47           |

Table A.2. Regression coefficients (standard errors), model error variance and R<sup>2</sup> of regional regression models for CV

| Log <sub>10</sub> CV | (Intercept) | Log <sub>10</sub> A | Log <sub>10</sub> P95 | TWin        | AI         | sigma | R <sup>2</sup> |
|----------------------|-------------|---------------------|-----------------------|-------------|------------|-------|----------------|
| Europe               | -0.49(0.05) | -0.05(0.00)         | 0.06(0.03)            | 0.00(0.00)  | 0.22(0.01) | 0.15  | 0.29           |
| Northeastern         | -1.31(0.10) | -0.02(0.01)         | 0.54(0.08)            |             | 0.47(0.03) | 0.1   | 0.48           |
| Atlantic             | -0.40(0.02) | -0.05(0.01)         |                       | -0.02(0.00) | 0.21(0.01) | 0.14  | 0.28           |
| Central-Eastern      | -2.43(0.29) |                     | 1.42(0.29)            | -0.04(0.00) | 0.60(0.04) | 0.13  | 0.61           |
| Alpine               | 0.50(0.10)  | -0.05(0.01)         | -0.64(0.07)           | 0.01(0.00)  | 0.08(0.03) | 0.13  | 0.37           |
| Mediterranean        | 0.23(0.11)  | -0.08(0.01)         | -0.45(0.08)           |             | 0.12(0.02) | 0.14  | 0.55           |

Commented [A101]: Residual normality?

Table A.3. Measure for general dominance (additional contributions) for MAF – indicating general dominance. For each row: highest value indicates most important variable in terms of improvement of the model fit for the given regression, second highest indicates second most important, lowest indicates least important. Summing over measures gives R<sup>2</sup> of regression.

| Log <sub>10</sub> MAF | Log <sub>10</sub> A | Log <sub>10</sub> P95 | TWin | AI   | R <sup>2</sup> |
|-----------------------|---------------------|-----------------------|------|------|----------------|
| Europe                | 0.12                | 0.25                  | 0.01 | 0.09 | 0.47           |
| Northeastern          | 0.14                | 0.1                   | 0.03 | 0.14 | 0.41           |
| Atlantic              | 0.08                | 0.43                  | 0    |      | 0.51           |
| Central-Eastern       | 0.06                | 0.13                  | 0.13 | 0.01 | 0.33           |
| Alpine                | 0.15                | 0.07                  |      | 0.06 | 0.27           |
| Mediterranean         | 0.2                 | 0.15                  | 0.03 | 0.1  | 0.47           |

Table A.4. Measure for general dominance (additional contributions) for CV – indicating general dominance. For each row: highest value indicates most important variable in terms of improvement of the model fit for the given regression, second highest indicates second most important, lowest indicates least important. Summing over measures gives  $R^2$  of regression.

|                 | Log <sub>10</sub> CV | Log <sub>10</sub> A | Log <sub>10</sub> P95 | TWin | AI   | R2   |
|-----------------|----------------------|---------------------|-----------------------|------|------|------|
| Europe          | 0.03                 | 0.04                | 0.01                  | 0.21 | 0.29 |      |
| Northeastern    | 0.02                 | 0.05                |                       | 0.42 | 0.48 |      |
| Atlantic        | 0.04                 |                     | 0.05                  | 0.19 | 0.28 |      |
| Central-Eastern |                      |                     |                       |      |      |      |
| Eastern         |                      |                     | 0.03                  | 0.14 | 0.44 | 0.61 |
| Alpine          | 0.03                 | 0.2                 | 0.01                  | 0.13 | 0.37 |      |
| Mediterranean   | 0.09                 | 0.2                 |                       | 0.26 | 0.55 |      |

Table A.5: Spearman-Correlation between statistical moments of flood series, including mean specific discharge MAF, mean specific discharge normalized to a catchment area  $MAF_a$  of  $a=100km^2$ , the coefficient of variation CV, the coefficient of skewness CS, and catchment attributes. Statistically significant estimates (at the 5% level) are printed in bold.

| skewness CS, and catchment attributes. Statistically significant estimates (at the 5% level) are printed in bold. |              |                  |              |              |              |              |                  |              |              |              |                  |              |              |                 |                  |              |              |              |                  |              |              |               |                  |              |              |              |              |              |              |
|-------------------------------------------------------------------------------------------------------------------|--------------|------------------|--------------|--------------|--------------|--------------|------------------|--------------|--------------|--------------|------------------|--------------|--------------|-----------------|------------------|--------------|--------------|--------------|------------------|--------------|--------------|---------------|------------------|--------------|--------------|--------------|--------------|--------------|--------------|
| Europe                                                                                                            |              |                  |              |              |              | Northeastern |                  |              |              | Atlantic     |                  |              |              | Central-Eastern |                  |              |              | Alpine       |                  |              |              | Mediterranean |                  |              |              |              |              |              |              |
|                                                                                                                   | MAF          | MAF <sub>a</sub> | CV           | CS           |              | MAF          | MAF <sub>a</sub> | CV           | CS           | MAF          | MAF <sub>a</sub> | CV           | CS           | MAF             | MAF <sub>a</sub> | CV           | CS           | MAF          | MAF <sub>a</sub> | CV           | CS           | MAF           | MAF <sub>a</sub> | CV           | CS           |              |              |              |              |
| A                                                                                                                 |              |                  |              |              |              | <b>-0.44</b> | <b>-0.12</b>     | <b>-0.13</b> | <b>-0.13</b> | <b>-0.47</b> | 0.01             | <b>-0.16</b> | -0.07        | <b>-0.31</b>    | 0.01             | <b>-0.19</b> | <b>-0.08</b> | <b>-0.23</b> | -0.01            | 0.09         | <b>0.17</b>  | <b>-0.40</b>  | 0.02             | -0.03        | <b>-0.15</b> | <b>-0.48</b> | 0.03         | <b>-0.25</b> | <b>-0.18</b> |
| MAP                                                                                                               | <b>0.62</b>  | <b>0.59</b>      | <b>-0.33</b> | -0.01        | <b>0.18</b>  | <b>0.15</b>  | <b>-0.23</b>     | <b>0.15</b>  | <b>0.64</b>  | <b>0.67</b>  | <b>-0.33</b>     | -0.03        | <b>0.25</b>  | <b>0.24</b>     | <b>-0.49</b>     | <b>-0.38</b> | <b>0.34</b>  | <b>0.26</b>  | <b>-0.61</b>     | <b>-0.13</b> | <b>0.42</b>  | <b>0.48</b>   | <b>-0.68</b>     | <b>-0.35</b> |              |              |              |              |              |
| P95                                                                                                               | <b>0.64</b>  | <b>0.60</b>      | <b>-0.22</b> | 0.02         | <b>0.21</b>  | 0.02         | -0.10            | <b>0.17</b>  | <b>0.67</b>  | <b>0.66</b>  | <b>-0.22</b>     | 0.00         | <b>0.39</b>  | <b>0.31</b>     | <b>-0.19</b>     | <b>-0.26</b> | <b>0.32</b>  | <b>0.24</b>  | <b>-0.58</b>     | <b>-0.14</b> | <b>0.49</b>  | <b>0.52</b>   | <b>-0.59</b>     | <b>-0.34</b> |              |              |              |              |              |
| Pmax                                                                                                              | <b>0.61</b>  | <b>0.55</b>      | <b>-0.05</b> | <b>0.12</b>  | <b>0.19</b>  | -0.04        | -0.09            | <b>0.20</b>  | <b>0.53</b>  | <b>0.52</b>  | <b>0.14</b>      | <b>0.17</b>  | <b>0.30</b>  | <b>0.22</b>     | <b>-0.18</b>     | <b>-0.23</b> | <b>0.36</b>  | <b>0.26</b>  | <b>-0.40</b>     | <b>-0.09</b> | <b>0.57</b>  | <b>0.49</b>   | <b>-0.36</b>     | <b>-0.20</b> |              |              |              |              |              |
| TSpr                                                                                                              |              |                  |              |              |              | <b>-0.22</b> | <b>-0.22</b>     | <b>0.26</b>  | 0.00         | <b>-0.31</b> | <b>-0.35</b>     | <b>0.58</b>  | <b>0.23</b>  | <b>-0.29</b>    | <b>-0.29</b>     | 0.02         | <b>-0.14</b> | <b>-0.14</b> | -0.11            | <b>0.50</b>  | <b>0.41</b>  | <b>-0.17</b>  | <b>-0.14</b>     | <b>0.38</b>  | -0.04        | -0.09        | <b>-0.12</b> | <b>0.17</b>  | 0.02         |
| TWin                                                                                                              | <b>-0.04</b> | <b>-0.07</b>     | <b>0.04</b>  | <b>-0.06</b> | -0.04        | <b>-0.20</b> | <b>0.20</b>      | <b>0.30</b>  | -0.02        | -0.03        | <b>-0.23</b>     | <b>-0.17</b> | <b>-0.28</b> | <b>-0.33</b>    | <b>-0.52</b>     | <b>-0.31</b> | <b>-0.11</b> | <b>-0.10</b> | <b>0.10</b>      | <b>-0.12</b> | <b>0.12</b>  | -0.04         | <b>0.27</b>      | <b>0.14</b>  |              |              |              |              |              |
| SM                                                                                                                | <b>0.58</b>  | <b>0.57</b>      | <b>-0.31</b> | -0.03        | <b>0.17</b>  | <b>0.16</b>  | <b>-0.14</b>     | <b>0.19</b>  | <b>0.52</b>  | <b>0.55</b>  | <b>-0.29</b>     | -0.05        | <b>0.28</b>  | <b>0.28</b>     | <b>-0.4</b>      | <b>-0.33</b> | <b>0.26</b>  | <b>0.22</b>  | <b>-0.56</b>     | <b>-0.10</b> | <b>0.45</b>  | <b>0.50</b>   | <b>-0.64</b>     | <b>-0.37</b> |              |              |              |              |              |
| PET                                                                                                               |              | <b>-0.05</b>     | -0.03        | <b>0.39</b>  | <b>0.14</b>  | <b>-0.30</b> | <b>-0.33</b>     | <b>0.60</b>  | <b>0.22</b>  | <b>-0.23</b> | <b>-0.22</b>     | <b>0.34</b>  | 0.03         | 0.02            |                  |              |              | <b>0.07</b>  | <b>0.68</b>      | <b>0.45</b>  | <b>-0.16</b> | <b>-0.11</b>  | <b>0.11</b>      | <b>-0.10</b> | <b>-0.11</b> | <b>-0.21</b> | <b>0.63</b>  | <b>0.31</b>  |              |
| AI                                                                                                                |              |                  |              |              |              | <b>-0.55</b> | <b>-0.53</b>     | <b>0.46</b>  | <b>0.07</b>  | <b>-0.36</b> | <b>-0.36</b>     | <b>0.62</b>  | <b>0.12</b>  | <b>-0.51</b>    | <b>-0.53</b>     | <b>0.38</b>  | 0.04         | <b>-0.16</b> | -0.12            | <b>0.63</b>  | <b>0.50</b>  | <b>-0.39</b>  | <b>-0.31</b>     | <b>0.50</b>  | <b>0.08</b>  | <b>-0.37</b> | <b>-0.43</b> | <b>0.69</b>  | <b>0.35</b>  |
| Elev                                                                                                              | <b>0.53</b>  | <b>0.55</b>      | <b>0.08</b>  | <b>0.20</b>  | <b>0.35</b>  | <b>0.47</b>  | <b>-0.31</b>     | 0.06         | <b>0.38</b>  | <b>0.44</b>  | <b>0.35</b>      | <b>0.22</b>  | <b>0.48</b>  | <b>0.50</b>     | <b>0.21</b>      | <b>0.16</b>  | <b>0.19</b>  | <b>0.16</b>  | <b>-0.47</b>     | 0.00         | 0.06         |               | 0.02             | <b>0.20</b>  | <b>0.20</b>  |              |              |              |              |
| Slope                                                                                                             | <b>0.63</b>  | <b>0.65</b>      | -0.01        | <b>0.16</b>  | <b>0.34</b>  | <b>0.39</b>  | <b>-0.36</b>     | 0.04         | <b>0.58</b>  | <b>0.62</b>  | <b>0.17</b>      | <b>0.19</b>  | <b>0.29</b>  | <b>0.30</b>     | -0.01            | 0.02         | <b>0.25</b>  | <b>0.24</b>  | <b>-0.40</b>     | -0.01        | <b>0.33</b>  | <b>0.37</b>   | 0.06             | 0.06         |              |              |              |              |              |
| LUF                                                                                                               | <b>0.46</b>  | <b>0.45</b>      | <b>-0.10</b> | <b>0.06</b>  | <b>0.30</b>  | <b>0.28</b>  | -0.01            | 0.05         | <b>0.43</b>  | <b>0.45</b>  | <b>0.14</b>      | <b>0.14</b>  | 0.08         | 0.01            | <b>-0.39</b>     | <b>-0.24</b> | <b>0.27</b>  | <b>0.16</b>  | <b>-0.26</b>     | 0.03         | <b>0.40</b>  | <b>0.32</b>   | 0.03             | <b>-0.03</b> |              |              |              |              |              |
| LUW                                                                                                               | <b>-0.30</b> | <b>-0.16</b>     | <b>-0.27</b> | <b>-0.15</b> | <b>-0.25</b> | <b>-0.21</b> | <b>-0.22</b>     | -0.06        | <b>-0.19</b> | -0.04        | <b>-0.20</b>     | -0.06        | <b>-0.55</b> | <b>-0.55</b>    | <b>-0.50</b>     | <b>-0.23</b> | <b>-0.16</b> | 0.03         | <b>-0.19</b>     | <b>-0.14</b> | <b>-0.40</b> | -0.10         | <b>-0.19</b>     | -0.10        |              |              |              |              |              |
| Stex                                                                                                              |              | <b>-0.06</b>     | <b>-0.06</b> | <b>0.29</b>  | <b>0.11</b>  | <b>-0.12</b> | -0.07            | <b>0.37</b>  | <b>0.25</b>  | -0.06        | -0.05            | <b>0.17</b>  | -0.01        | <b>0.29</b>     |                  |              |              | <b>0.32</b>  | <b>0.53</b>      | <b>0.31</b>  | -0.02        | -0.06         | <b>0.23</b>      | 0.01         | <b>-0.22</b> | <b>-0.18</b> | <b>0.26</b>  | <b>0.16</b>  |              |

#### Data Availability

The flood data used in this paper are available at [https://github.com/tuwhydro/europe\\_floods](https://github.com/tuwhydro/europe_floods). The authors acknowledge the E-OBS dataset from the EU-FP6 project UERRA (<http://www.uerra.eu>) and the Copernicus

700 Climate Change Service, and the data providers in the ECA&D project (<https://www.ecad.eu>), as well as the CCM River and Catchment database (<https://data.europa.eu/>), the Global Aridity Index and Potential EvapoTranspiration

Climate Database (<https://doi.org/10.6084/m9.figshare.7504448.v3>), the CPC Soil Moisture database (<https://www.cpc.ncep.noaa.gov/>), the data on terrain elevation provided by the USGS

(<https://www.usgs.gov/>), the Corine Land Cover data set (<https://land.copernicus.eu/>) and the European soil 705 database (<https://esdac.jrc.ec.europa.eu/>).

#### Author Contributions

DL performed the analysis and prepared the paper. GB designed the overall study. All co-authors contributed to the interpretation of the results and writing of the paper.

Commented [A102]: Consider using CREDIT system.

710

#### Competing Interests

The authors declare that they have no conflict of interest.

#### Acknowledgements

715 The authors would like to acknowledge funding from the Austrian Science Funds (FWF) “SPATE” project I 4776 and the German Research Foundation (DFG; grant no. FOR 2416), the FWF Vienna Doctoral Programme on Water Resource Systems (W1219-N28) and the European Union’s Horizon 2020 Research and Innovation Programme under the Marie Skłodowska-Curie grant agreement no. 676027.

#### 720 References

Amponsah, W. et al. Integrated high-resolution dataset of high-intensity European and Mediterranean flash floods. *Earth Syst. Sci. Data* 10, 1783–1794 (2018).

Azen, R., & Budescu, D. V. (2003). The dominance analysis approach for comparing predictors in multiple regression. *Psychological methods*, 8(2), 129.

725 Bayliss, A. C., & Jones, R. C. (1993). Peaks-over-threshold flood database. Institute of Hydrology.

Berghuijs, W. R., Woods, R. A., Hutton, C. J., & Sivapalan, M. (2016). Dominant flood generating mechanisms across the United States. *Geophysical Research Letters*, 43(9), 4382–4390.

Berghuijs, W. R., Harrigan, S., Molnar, P., Slater, L. J., & Kirchner, J. W. (2019). The relative importance of different flood-generating mechanisms across Europe. *Water Resources Research*, 55(6), 4582–4593.

730 Bertola, M., Viglione, A., Lun, D., Hall, J., & Blöschl, G. (2020). Flood trends in Europe: are changes in small and big floods different?. *Hydrology & Earth System Sciences*, 24(4).

Blöschl, G., & Sivapalan, M. (1995). Scale issues in hydrological modelling: a review. *Hydrological processes*, 9(3–4), 251–290.

735 Blöschl, G. and M. Sivapalan (1997) Process controls on regional flood frequency: Coefficient of variation and basin scale. *Water Resources Research*, 33 (12), pp. 2967–2980.

Blöschl, G., Ardoin-Bardin, S., Bonell, M., Dorninger, M., Goodrich, D., Gutknecht, D., ... & Szolgay, J. (2007).

At what scales do climate variability and land cover change impact on flooding and low flows?  
Hydrological Processes, 21(9), 1241-1247.

Blöschl, G., Sivapalan, M., Wagener, T., Savenije, H., & Viglione, A. (Eds.). (2013). *Runoff prediction in 740 ungauged basins: synthesis across processes, places and scales*. Cambridge University Press.

Blöschl, G., Hall, J., Parajka, J., Perdigão, R. A., Merz, B., Arheimer, B., ... & Čanjevac, I. (2017). Changing climate shifts timing of European floods. *Science*, 357(6351), 588-590.

Blöschl, G., Hall, J., et al. (2019) Changing climate both increases and decreases European river floods. *Nature*, 573(7772), 108-111.

745 Blöschl, G., Kiss, A., Viglione, A. et al. Current European flood-rich period exceptional compared with past 500 years. *Nature* 583, 560–566 (2020). <https://doi.org/10.1038/s41586-020-2478-3>

Boorman, D. B., Hollis, J. M., & Lilly, A. (1995). *Hydrology of soil types: a hydrologically-based classification of the soils of United Kingdom*. Institute of Hydrology

750 Brath, A., Montanari, A., & Moretti, G. (2006). Assessing the effect on flood frequency of land use change via hydrological simulation (with uncertainty). *Journal of Hydrology*, 324(1-4), 141-153.

Cornes, R. C., van der Schrier, G., van den Besselaar, E. J., & Jones, P. D. (2018). An ensemble version of the E-OBS temperature and precipitation data sets. *Journal of Geophysical Research: Atmospheres*, 123(17), 9391-9409.

Cressie, N. A. (1993). *Statistics for spatial data*. John Wiley and Sons. Inc., New York.

755 Fan, Y., & Van Den Dool, H. (2004). Climate Prediction Center global monthly soil moisture data set at 0.5 resolution for 1948 to present. *Journal of Geophysical Research: Atmospheres*, 109(D10).

Farquharson, F. A. K., Meigh, J. R., & Sutcliffe, J. V. (1992). Regional flood frequency analysis in arid and semi-arid areas. *Journal of Hydrology*, 138(3-4), 487-501.

760 Gaál, L., J. Szolgay, S. Kohnová, J. Parajka, R. Merz, A. Viglione and G. Blöschl (2012) Flood timescales: Understanding the interplay of climate and catchment processes through comparative hydrology, *Water Resources Research*, 48, W04511, doi:10.1029/2011WR011509.

Gaume, E., V. Bain, P. Bernardara, O. Newinger, M. Barbuc, A. Bateman, L. Blaškovicová, G. Blöschl, M. Borga, A. Dumitrescu, I. Daliakopoulos, J. Garcia, A. Irimescu, S. Kohnova, A. Koutroulis, L. Marchi, S. Matreata, V. Medina, E. Preciso, D. Sempere-Torres, G. Stancalie, J. Szolgay, I. Tsanis, D. Velasco  
765 and A. Viglione (2009) A compilation of data on European flash floods. *Journal of Hydrology*, 367 (12), 70-78.

Gibbons, J. D. and Chakraborti, S. (2010) *Nonparametric Statistical Inference*. CRC Press, Boca Raton 650pp.

Gioia, A., Iacobellis, V., Manfreda, S., & Fiorentino, M. (2012). Influence of infiltration and soil storage capacity on the skewness of the annual maximum flood peaks in a theoretically derived distribution.

770 *Hydrology and Earth System Sciences*, 16(3), 937.

Giorgi, F., Bi, X., & Pal, J. S. (2004). Mean, interannual variability and trends in a regional climate change experiment over Europe. I. Present-day climate (1961–1990). *Climate Dynamics*, 22(6), 733–756.

Grillakis, M.G., A.G. Koutroulis, J. Komma, I.K. Tsanis, W. Wagner, G. Blöschl (2016) Initial soil moisture effects on flash flood generation – A comparison between basins of contrasting hydro-climatic conditions. *Journal of Hydrology*, Volume 541, Part A, 206–217.

Hall, J., Arheimer, B., Aronica, G. T., Bilibashi, A., Bohác, M., Bonacci, O., ... & Claps, P. (2015). A European Flood Database: facilitating comprehensive flood research beyond administrative boundaries. *Changes in Flood Risk and Perception in Catchments and Cities*, 370, 89–95.

Hall, J. and G. Blöschl (2018) Spatial patterns and characteristics of flood seasonality in Europe, *Hydrology and Earth System Sciences*, 22, pp. 3883–3901, <https://doi.org/10.5194/hess-22-3883-2018>

Hofstätter M., Lexer A., Homan M. and G. Blöschl (2018) Large-scale heavy precipitation over central Europe and the role of atmospheric cyclone track types. *International Journal of Climatology*, 38, pp. e497–e517, <https://doi.org/10.1002/joc.5386>

Hofstätter, M., & Blöschl, G. (2019). Vb cyclones synchronized with the Arctic-/North Atlantic Oscillation. *Journal of Geophysical Research: Atmospheres*, 124(6), 3259–3278.

Iacobellis, V., Claps, P., and Fiorentino, M.: Climatic control on the variability of flood distribution, *Hydrol. Earth Syst. Sci.*, 6, 229–238, <https://doi.org/10.5194/hess-6-229-2002>, 2002.

Kendall, M. & Stuart, A. (1969). *The advanced theory of statistics*. London: Griffin.

Lilly, A., Boorman, D. B., & Hollis, J. M. (1998). The development of a hydrological classification of UK soils and the inherent scale changes. In *Soil and Water Quality at Different Scales* (pp. 299–302). Springer, Dordrecht.

Marchi, L., M. Borga, E. Preciso, and E. Gaume (2010), Characterisation of selected extreme flash floods in Europe and implications for flood risk management, *Journal of Hydrology*, 394(1–2), 118–133, doi:10.1016/j.jhydrol.2010.07.017.

Maréchal, D., & Holman, I. P. (2005). Development and application of a soil classification-based conceptual catchment-scale hydrological model. *Journal of Hydrology*, 312(1–4), 277–293.

Merz R. and G. Blöschl (2003) A process typology of regional floods. *Water Resources Research*, 39 (12), article number 1340.

Merz, R., Blöschl, G., & Parajka, J. (2006). Spatio-temporal variability of event runoff coefficients. *Journal of Hydrology*, 331(3–4), 591–604.

Merz, R., & Blöschl, G. (2008a). Flood frequency hydrology: 1. Temporal, spatial, and causal expansion of information. *Water Resources Research*, 44(8).

Merz, R., & Blöschl, G. (2008b). Flood frequency hydrology: 2. Combining data evidence. *Water Resources Research*, 44(8).

Merz R and G. Blöschl (2009) Process controls on the statistical flood moments - a data based analysis. *Hydrological Processes*, 23 (5) 675–696.

- Miller, J. D., & Brewer, T. (2018). Refining flood estimation in urbanized catchments using landscape metrics. *Landscape and Urban Planning*, 175, 34-49.
- Mimikou, M., & Gordios, J. (1989). Predicting the mean annual flood and flood quantiles for ungauged 810 catchments in Greece. *Hydrological sciences journal*, 34(2), 169-184.
- Pallard, B., Castellarin, A., and Montanari, A.: A look at the links between drainage density and flood statistics, *Hydrol. Earth Syst. Sci.*, 13, 1019–1029, <https://doi.org/10.5194/hess-13-1019-2009>, 2009.
- Panagos P., Van Liedekerke M., Jones A., Montanarella L., “European Soil Data Centre: Response to European policy support and public data requirements”; (2012) *Land Use Policy*, 29 (2), pp. 329-338.  
815 doi:10.1016/j.landusepol.2011.07.003
- Penna, D., Tromp-van Meerveld, H. J., Gobbi, A., Borga, M., & Dalla Fontana, G. (2011). The influence of soil moisture on threshold runoff generation processes in an alpine headwater catchment. *Hydrology and Earth System Sciences*, 15(3), 689-702.
- Perdigão, R. A. P., and G. Blöschl (2014) Spatiotemporal flood sensitivity to annual precipitation: Evidence for 820 landscape-climate coevolution, *Water Resour. Res.*, 50, 5492-5509, doi:10.1002/ 2014WR015365.
- Peschke, G., & Sambale, C. (1999). Hydrometric approaches to gain a better understanding of saturation excess overland flow. *IAHS PUBLICATION*, 13-22.
- Picciafuoco, T., R. Morbidelli, A. Flammini, C. Saltalippi, C. Corradini, P. Strauss and G. Blöschl (2019) A pedotransfer function for field-scale saturated hydraulic conductivity of a small watershed. *Vadose Zone Journal* 18, 190018. doi:10.2136/vzj2019.02.0018  
825
- Roekaerts, M. (2002) The biogeographical regions map of Europe. Basic principles of its creation and overview of its development. Copenhagen: European Environment Agency. <https://www.eea.europa.eu/data-andmaps/data/biogeographical-regions-europe-3>
- Rogger, M., H. Pirkel, A. Viglione, J. Komma, B. Kohl, R. Kirnbauer, R. Merz, and G. Blöschl (2012), Step 830 changes in the flood frequency curve: Process controls, *Water Resour. Res.*, 48, W05544, doi:10.1029/2011WR011187.
- Rogger, M., Viglione, A., Derx, J., & Blöschl, G. (2013). Quantifying effects of catchments storage thresholds on step changes in the flood frequency curve. *Water Resources Research*, 49(10), 6946-6958.
- Rogger, M., M. Agnoletti, A. Alaoui, J.C. Bathurst., G. Bodner, M. Borga, V. Chaplot, F. Gallart, G. Glatzel, J. 835 Hall, J. Holden, L. Holko, R. Horn, A. Kiss, S. Kohnova, G. Leitinger, B. Lennartz, J. Parajka, R. Perdigão, S. Peth, L. Plavcová, J.N. Quinton, M. Robinson, J.L. Salinas, A. Santoro, J. Szolgay, S. Tron, J.J.H. van den Akker, A. Viglione and G. Blöschl (2017) Land-use change impacts on floods at the catchment scale: Challenges and opportunities for future research. *Water Resources Research*, 53, 5209–5219, doi:10.1002/2017WR020723.



840 Rosbjerg, D., G. Blöschl, D. H. Burn, A. Castellarin, B. Croke, G. DiBaldassarre, V. Iacobellis, T. R.  
Kjeldsen, G. Kuczera, R. Merz, A. Montanari, D. Morris, T. B. M. J. Ouarda, L. Ren, M. Rogger, J. L.  
Salinas, E.

Toth, A. Viglione (2013) Prediction of floods in ungauged basins. Chapter 9 in: G. Blöschl, M.  
Sivapalan, T. Wagener, A. Viglione, H. Savenije (Eds.) *Runoff Prediction in Ungauged Basins -*  
Synthesis across Processes, Places and Scales. Cambridge University Press, Cambridge, UK, pp. 135-  
845 162.

Salinas, J. L., Castellarin, A., Viglione, A., Kohnova, S., & Kjeldsen, T. R. (2014a). Regional parent flood  
frequency distributions in Europe-Part 1: Is the GEV model suitable as a pan-European parent?.  
*Hydrology and Earth System Sciences*, 18(11), 4381.

Salinas, J. L., Castellarin, A., Kohnova, S., & Kjeldsen, T. R. (2014b). Regional parent flood frequency  
850 distributions in Europe-Part 2: Climate and scale controls. *Hydrol. Earth Syst. Sci.*, 18(11), 4391-4401.

Schmocker-Fackel, P., Näf, F., & Scherrer, S. (2007). Identifying runoff processes on the plot and catchment  
scale. *Hydrology and Earth System Sciences*, 11(2), 891-906.

Scherrer, S., Naef, F., Faeh, A. O., & Cordery, I. (2007). Formation of runoff at the hillslope scale during intense  
precipitation. *Hydrology and Earth System Sciences*, 11(2), 907-922.

855 Sivapalan, M. (2003) Process complexity at hillslope scale, process simplicity at the watershed scale: is  
there a connection? *Hydrol. Process.*, 17 (5) (2003), pp. 1037-1041

Sivapalan, M., Blöschl, G., Merz, R., & Gutknecht, D. (2005). Linking flood frequency to long-term water  
balance: Incorporating effects of seasonality. *Water Resources Research*, 41(6).

Smith, J. A. (1992). Representation of basin scale in flood peak distributions. *Water Resources Research*, 28(11),  
860 2993-2999.

Šraj, M., Viglione, A., Parajka, J., & Blöschl, G. (2016). The influence of non-stationarity in extreme  
hydrological events on flood frequency estimation, *Journal of Hydrology and Hydromechanics*, 64(4),  
426-437. doi: <https://doi.org/10.1515/johh-2016-0032>

Sun, D., Yang, H., Guan, D., Yang, M., Wu, J., Yuan, F., ... & Zhang, Y. (2018). The effects of land use change  
865 on soil infiltration capacity in China: A meta-analysis. *Science of the Total Environment*, 626, 13941401.

Trabucco, A., & Zomer, R. J. (2018). Global aridity index and potential evapotranspiration (ET0) climate database  
v2. CGIAR Consortium for Spatial Information (CGIAR-CSI). Available online:  
[https://figshare.](https://figshare.com/articles/Global_Aridity_Index_and_Potential_Evapotranspiration_ET0_Climate_Database_v2/7504448/1)  
870 [com/articles/Global\\_Aridity\\_Index\\_and\\_Potential\\_Evapotranspiration\\_ET0\\_Climate\\_Database\\_v2/750](https://figshare.com/articles/Global_Aridity_Index_and_Potential_Evapotranspiration_ET0_Climate_Database_v2/7504448/1)  
4448/1 (accessed on 25 June 2019).

Troch, P. A., T. Lahmers, A. Meira, R. Mukherjee, J. W. Pedersen, T. Roy, and R. Valdés-Pineda (2015), Catchment coevolution: A useful framework for improving predictions of hydrological change?, *Water Resour. Res.*, 51, 4903–4922, doi:10.1002/2015WR017032.

- 875 Viglione, A., R. Merz and G. Blöschl (2009) On the role of the runoff coefficient in the mapping of rainfall to flood return periods, *Hydrology and Earth System Sciences*, 13 (5) 577 - 593.
- Viglione, A., G. B. Chirico, R. Woods and G. Blöschl (2010a) Generalised synthesis of space–time variability in flood response: An analytical framework. *Journal of Hydrology*, 394 (1–2), 198–212. doi:10.1016/j.jhydrol.2010.05.047.
- 880 Viglione, A., Chirico, G. B., Komma, J., Woods, R., Borga, M., & Blöschl, G. (2010b). Quantifying space-time dynamics of flood event types. *Journal of Hydrology*, 394(1-2), 213-229. (not sure if this is the right citation, appears in text)
- Viglione, A., Merz, R., Salinas, J. L., & Blöschl, G. (2013). Flood frequency hydrology: 3. A Bayesian analysis. *Water Resources Research*, 49(2), 675-692.
- 885 Viglione, A., Merz, B., Viet Dung, N., Parajka, J., Nester, T., & Blöschl, G. (2016). Attribution of regional flood changes based on scaling fingerprints. *Water resources research*, 52(7), 5322-5340.
- Vogt, J., Soille, P., De Jager, A., Rimaviciute, E., Mehl, W., Foisneau, S., Bodis, K., Dusart, J., Paracchini, M., Haastруп, P., et al.: A pan-European river and catchment database, European Commission, EUR, 22920, 120, 2007.
- 890 Wang, W., H.-Y. Li, L. R. Leung, W. Yigzaw, J. Zhao, H. Lu, Z. Deng, Y. Demisie and G. Blöschl (2017) Nonlinear filtering effects of reservoirs on flood frequency curves at the regional scale. *Water Resources Research*, 53, 8277–8292, doi: 10.1002/2017WR020871
- Weingartner, R., Barben, M., & Spreafico, M. (2003). Floods in mountain areas—an overview based on examples from Switzerland. *Journal of Hydrology*, 282(1-4), 10-24.
- 895 Weisberg, S. (2005) *Applied linear regression*. John Wiley & Sons, Hoboken, NJ, 352 pp.
- Xoplaki, E., Gonzalez-Rouco, J. F., Luterbacher, J. & Wanner, H. Wet season Mediterranean precipitation variability: influence of large-scale dynamics and trends. *Clim. Dyn.* 23, 63–78 (2004).
- Zaman, M. A., Rahman, A., & Haddad, K. (2012). Regional flood frequency analysis in arid regions: A case study for Australia. *Journal of Hydrology*, 475, 74-83.
